# Supplementary material for: Lattice expansion and ligand twist during CO2 adsorption in flexible Cu bipyridine metal–organic frameworks
Source: Royal Society of Chemistry journal article supplement (doi:10.1039/d0ta03298k), 2020-01-01

**Supplementary Materials for**  
**Lattice Expansion and Ligand Twist during CO<sub>2</sub> Adsorption in Flexible Cu**  
**Bipyridine Metal-Organic Frameworks**

Samuel D. Marks,<sup>1\*</sup> Karina Riascos-Rodriguez,<sup>2</sup> Rodinson R. Arrieta-Pérez,<sup>2</sup> Andrey A. Yakovenko,<sup>3</sup> Jason Exley,<sup>4</sup> Paul G. Evans,<sup>1</sup> and Arturo J. [Hernández-Maldonado](#)<sup>2</sup>

<sup>1</sup> *Department of Materials Science and Engineering, University of Wisconsin, Madison, WI 53706*

<sup>2</sup> *Department of Chemical Engineering, University of Puerto Rico, Mayaguez, PR 00681*

<sup>3</sup> *Advanced Photon Source, Argonne National Laboratory, Argonne, Illinois 60439*

<sup>4</sup> *Micromeritics Instrument Corporation, Norcross, GA 30093*

This PDF file includes whole pattern profiles from Rietveld refinement of CPL-2 (P. 2-25) and CPL-5 (P. 26-48). The title of each plot includes the name of the compound and CO<sub>2</sub> gauge pressure at which the powder x-ray diffraction profile was acquired. The refinement residuals are plotted below each pattern.

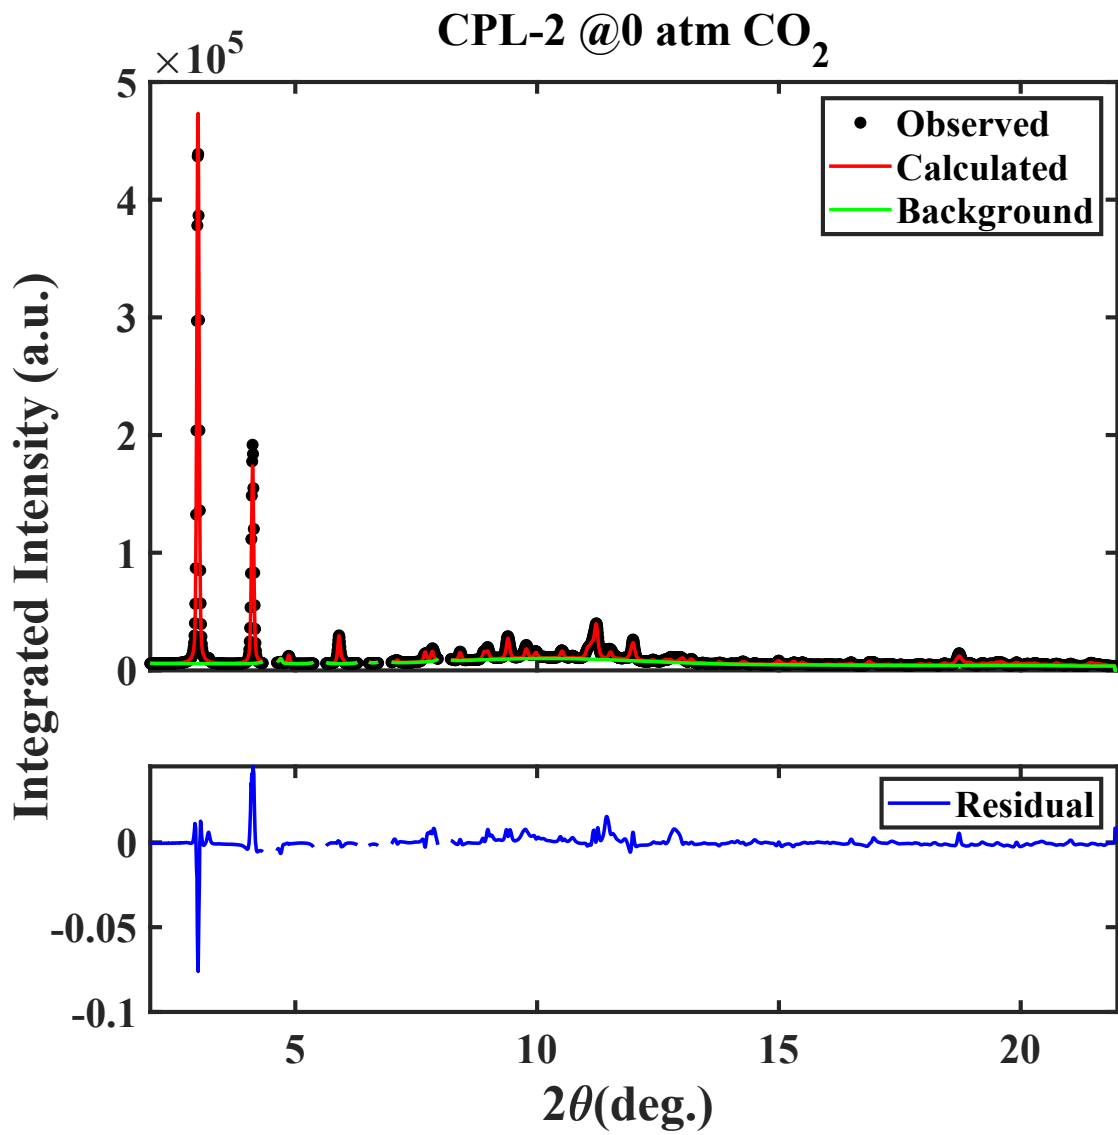

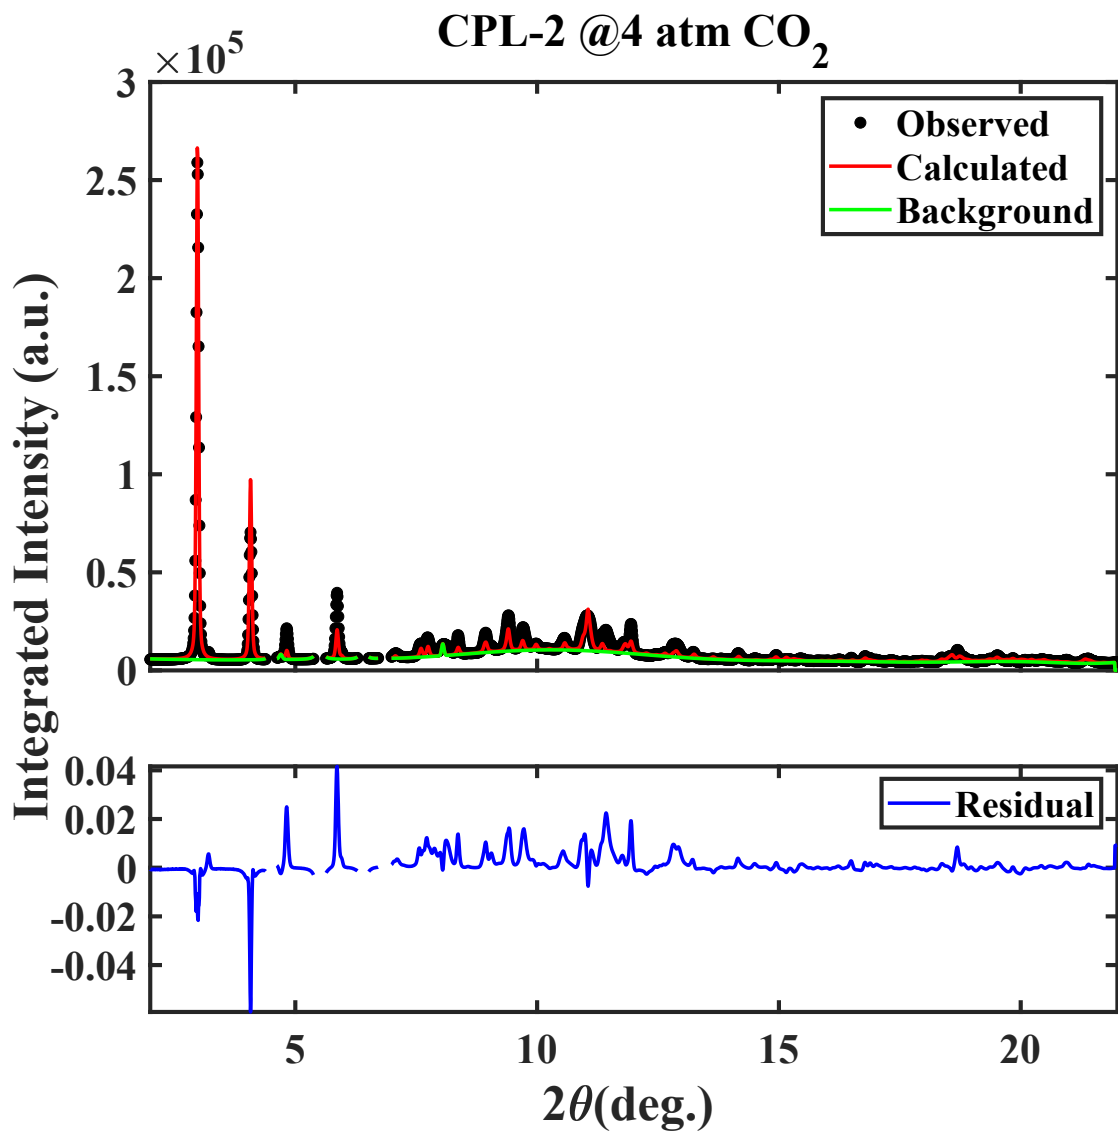

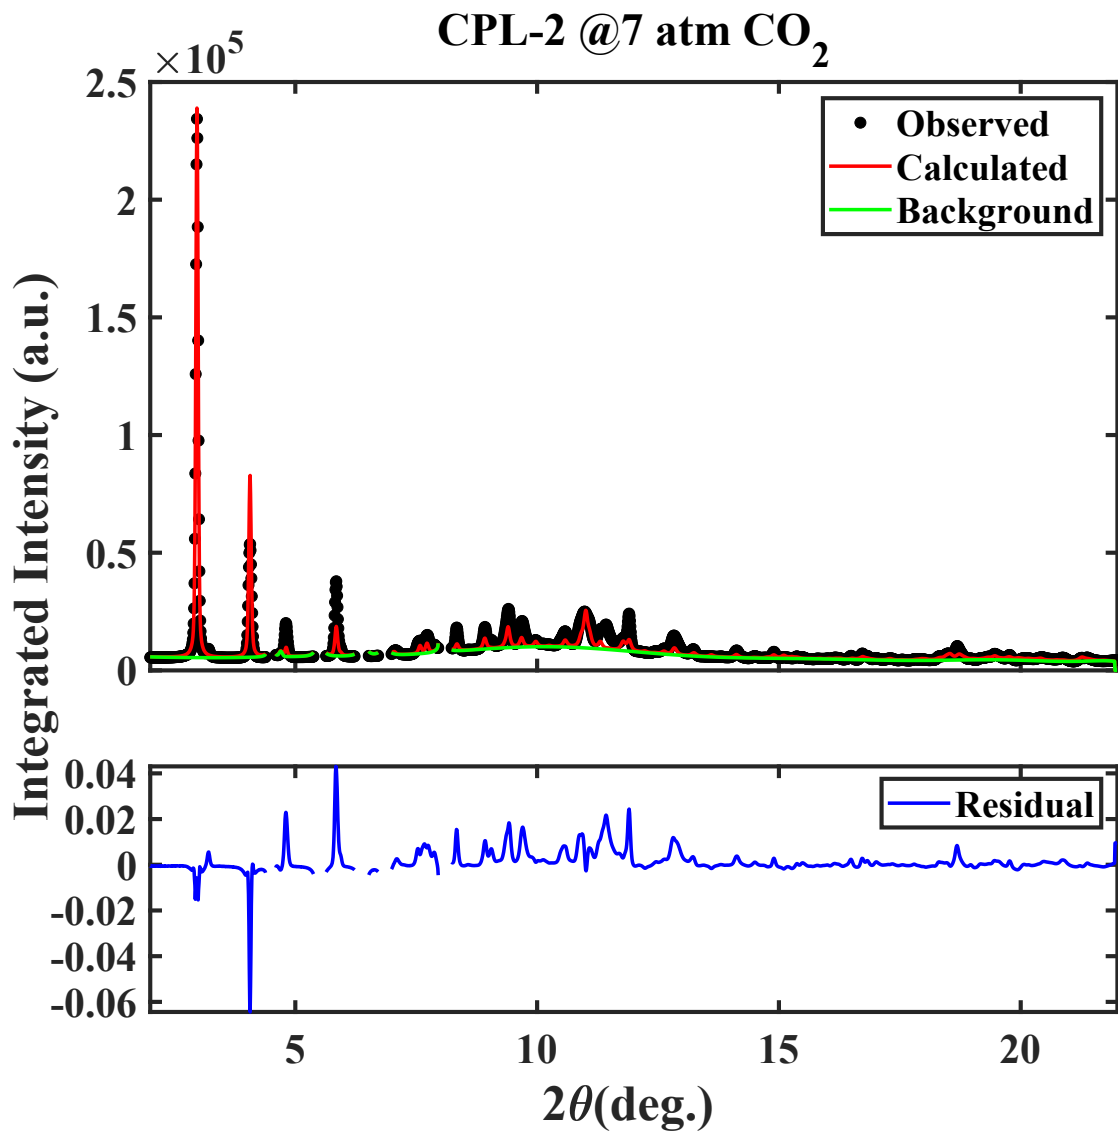

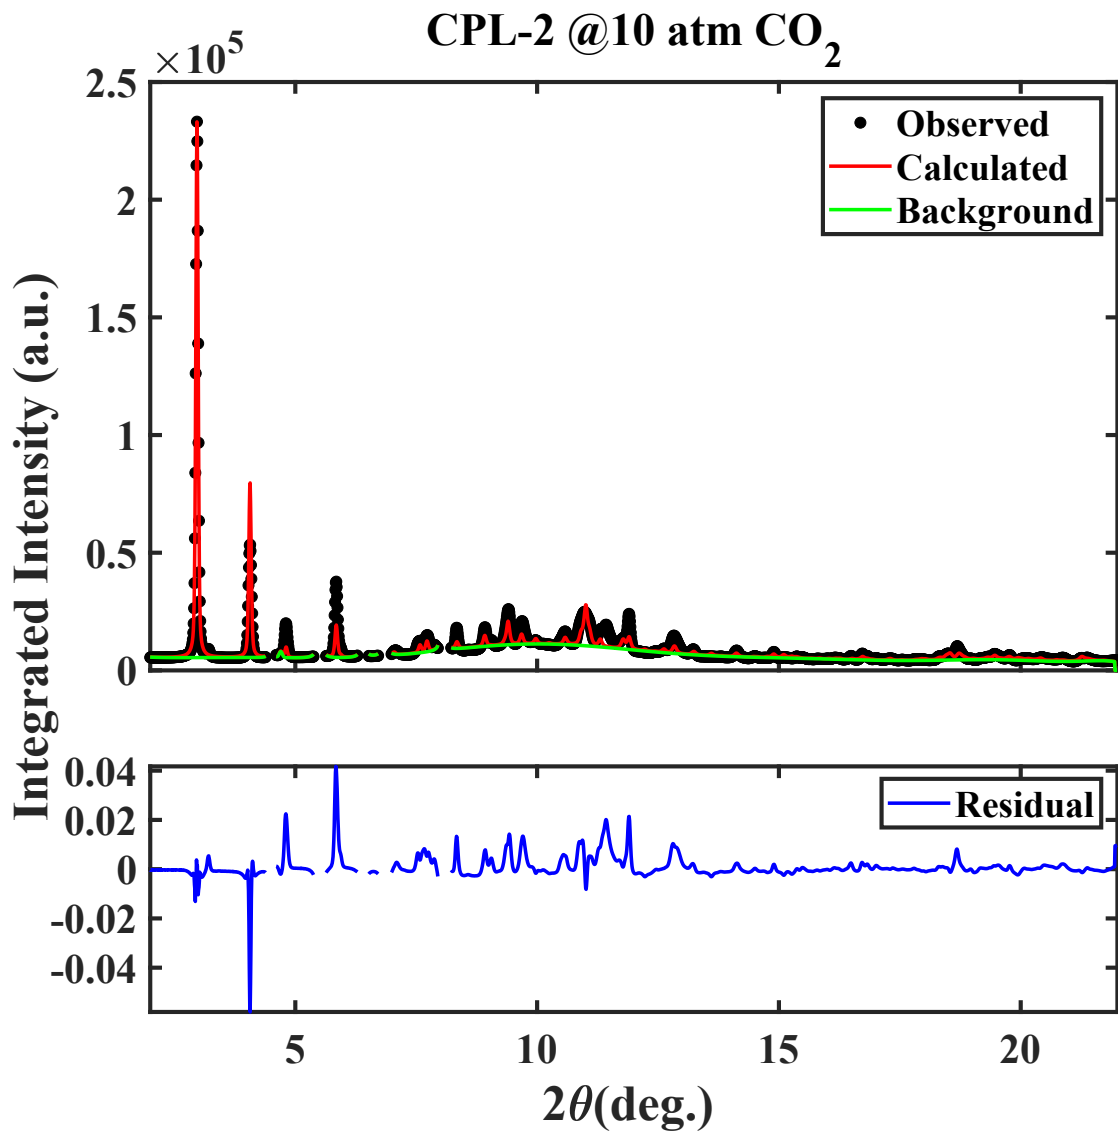

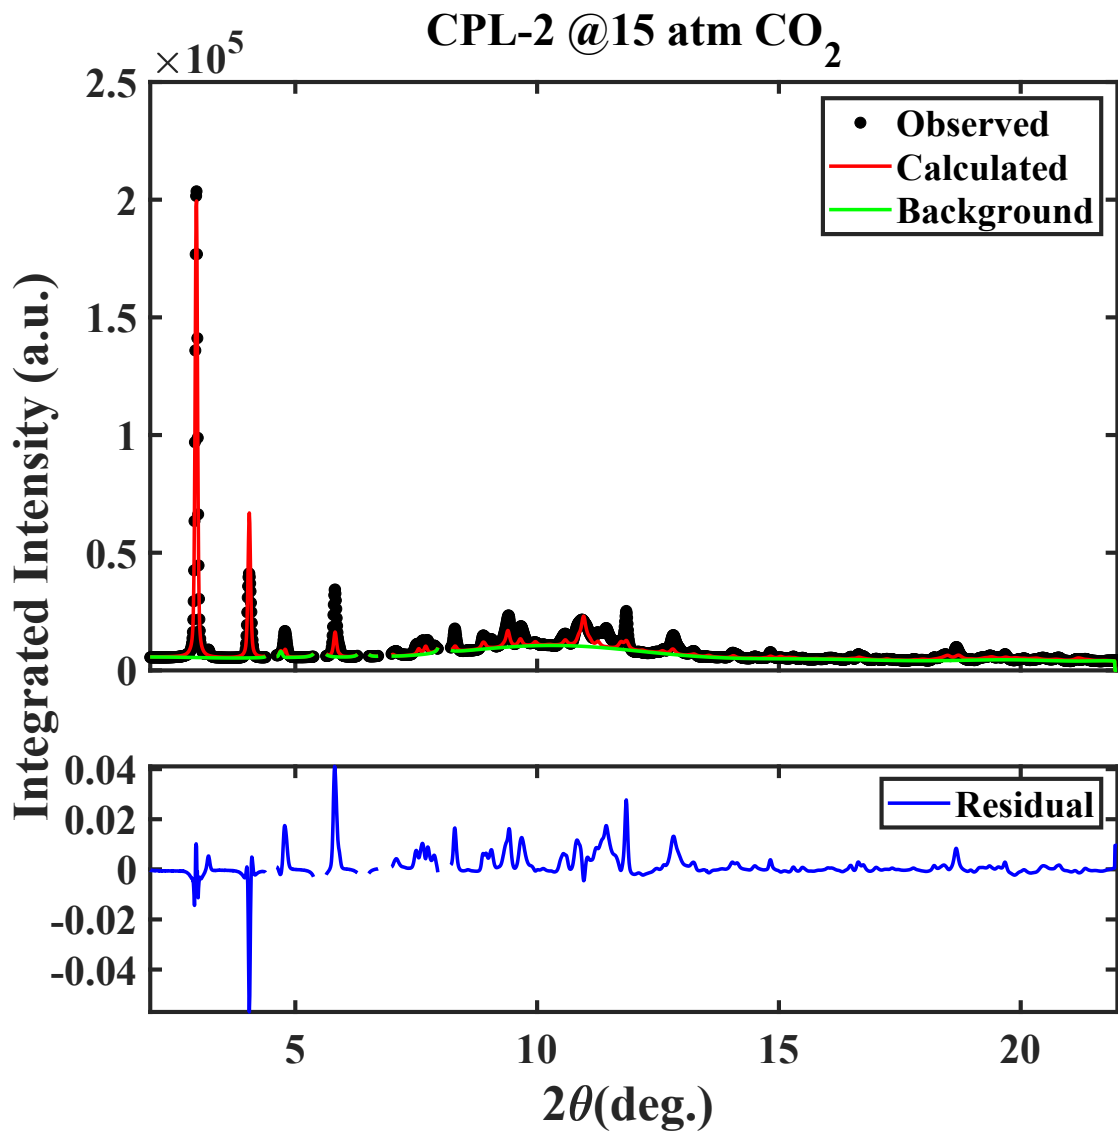

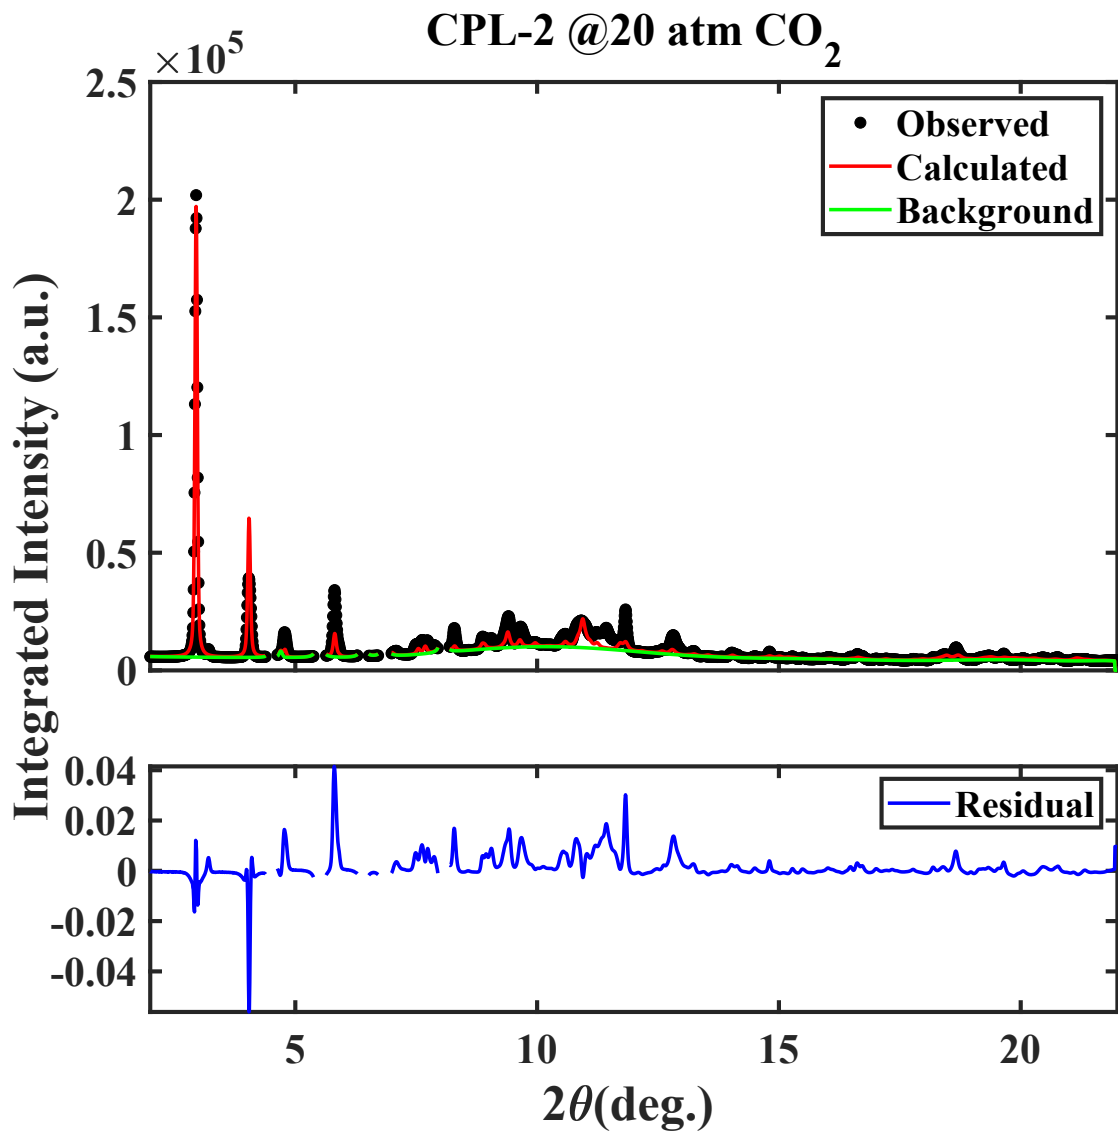

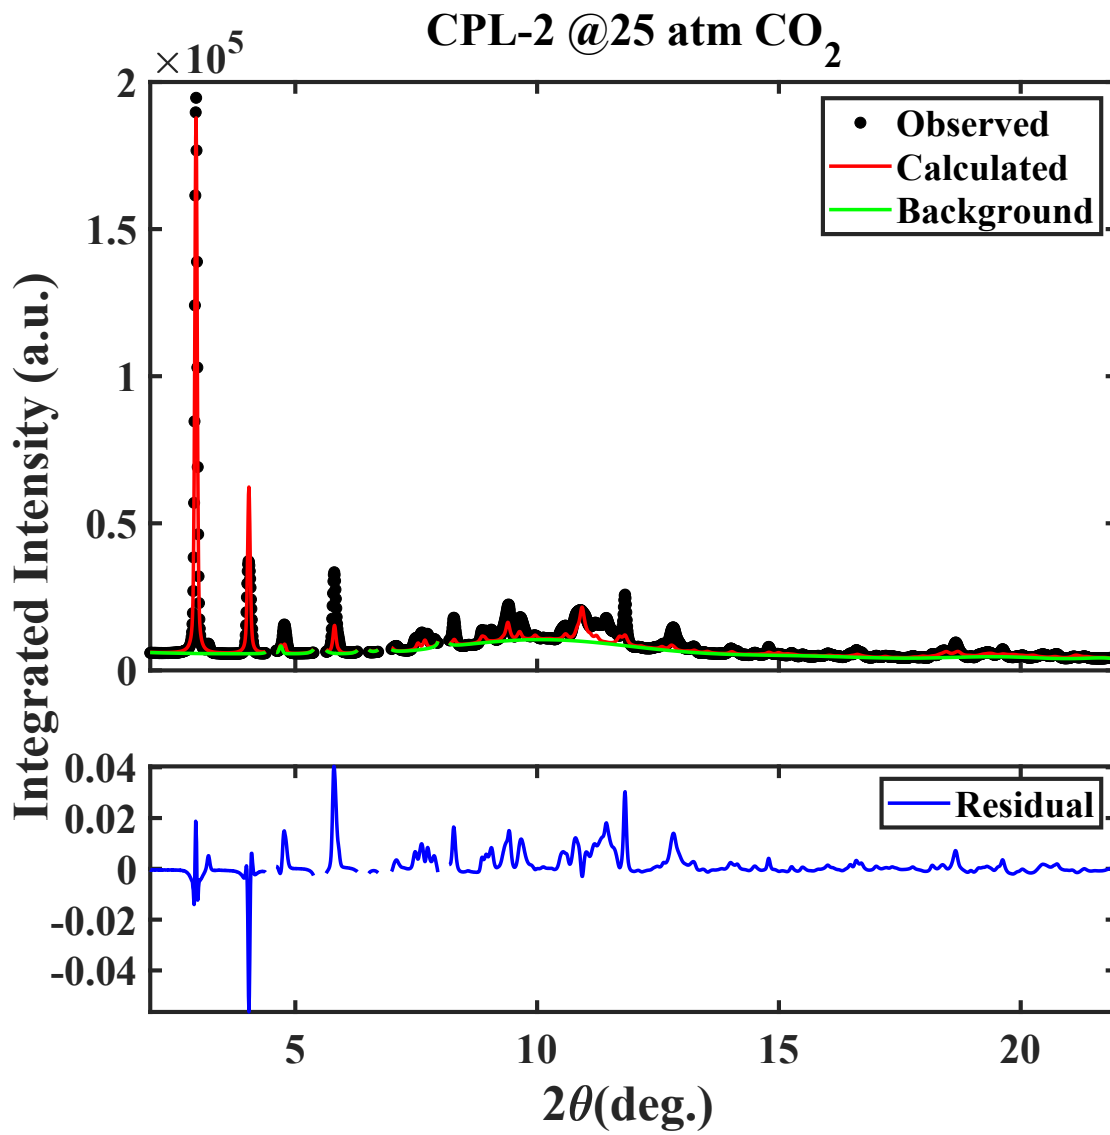



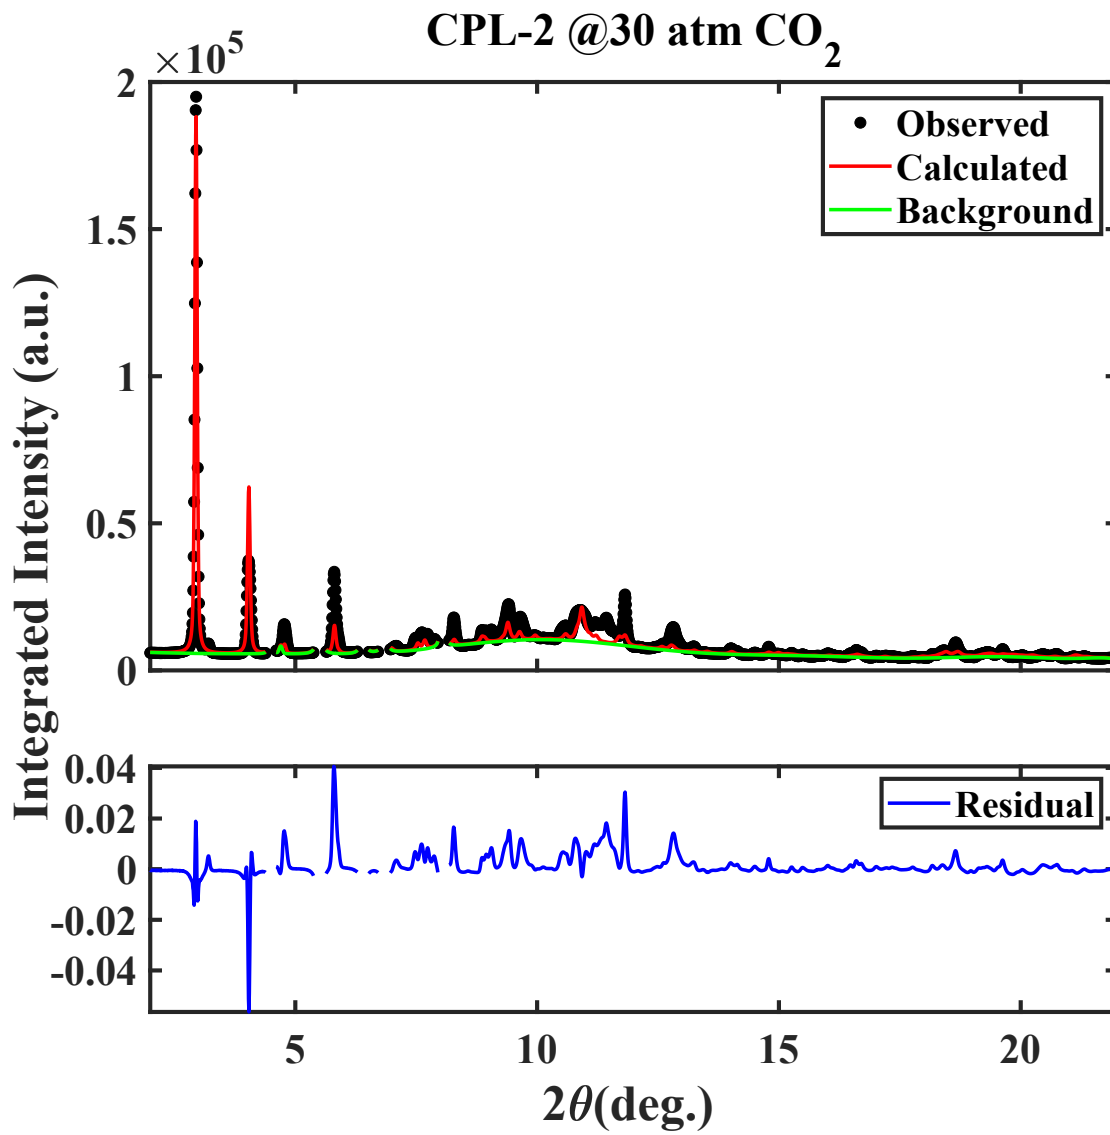

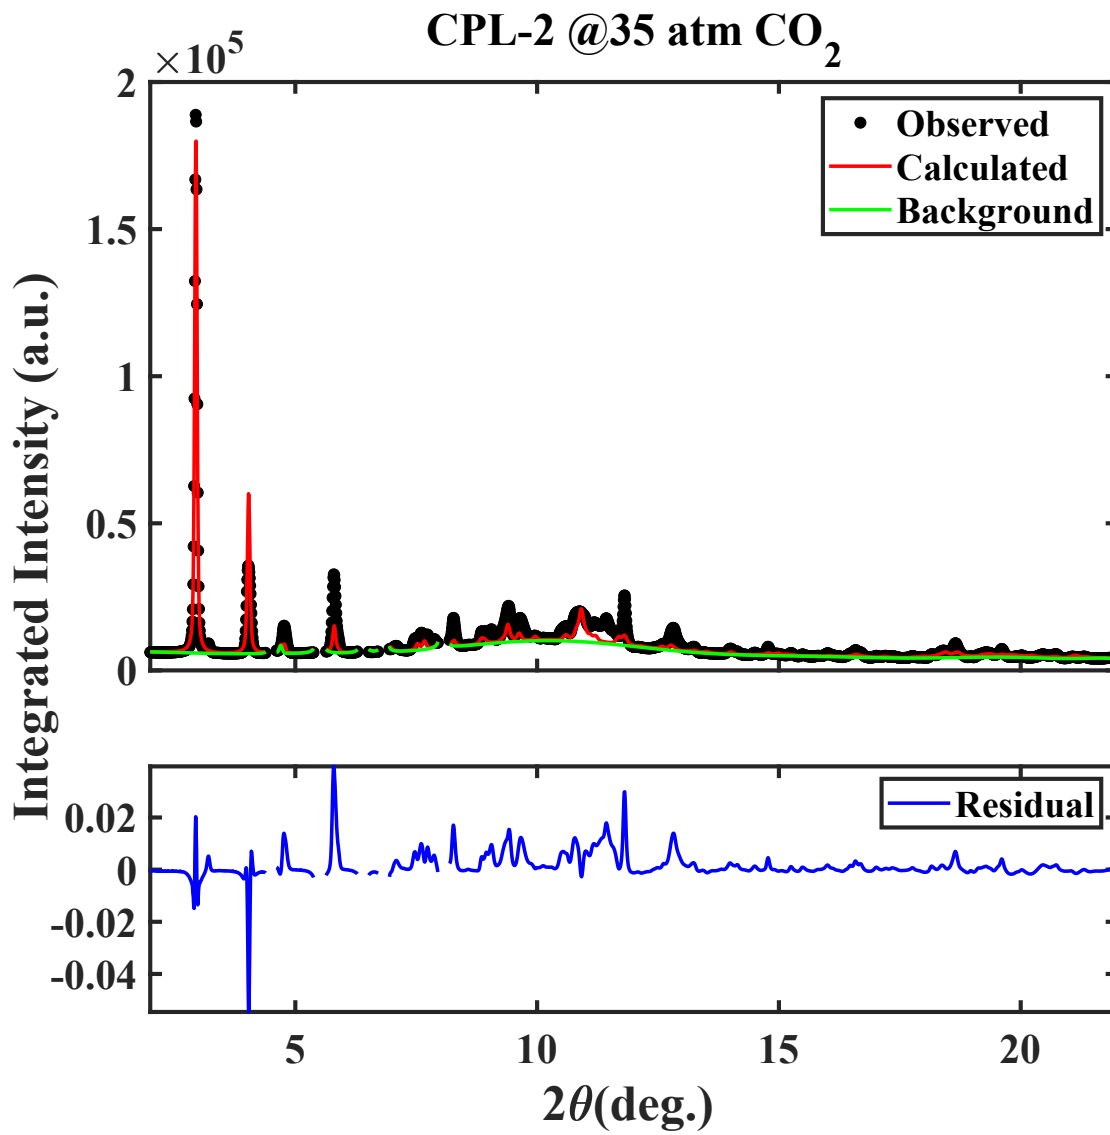

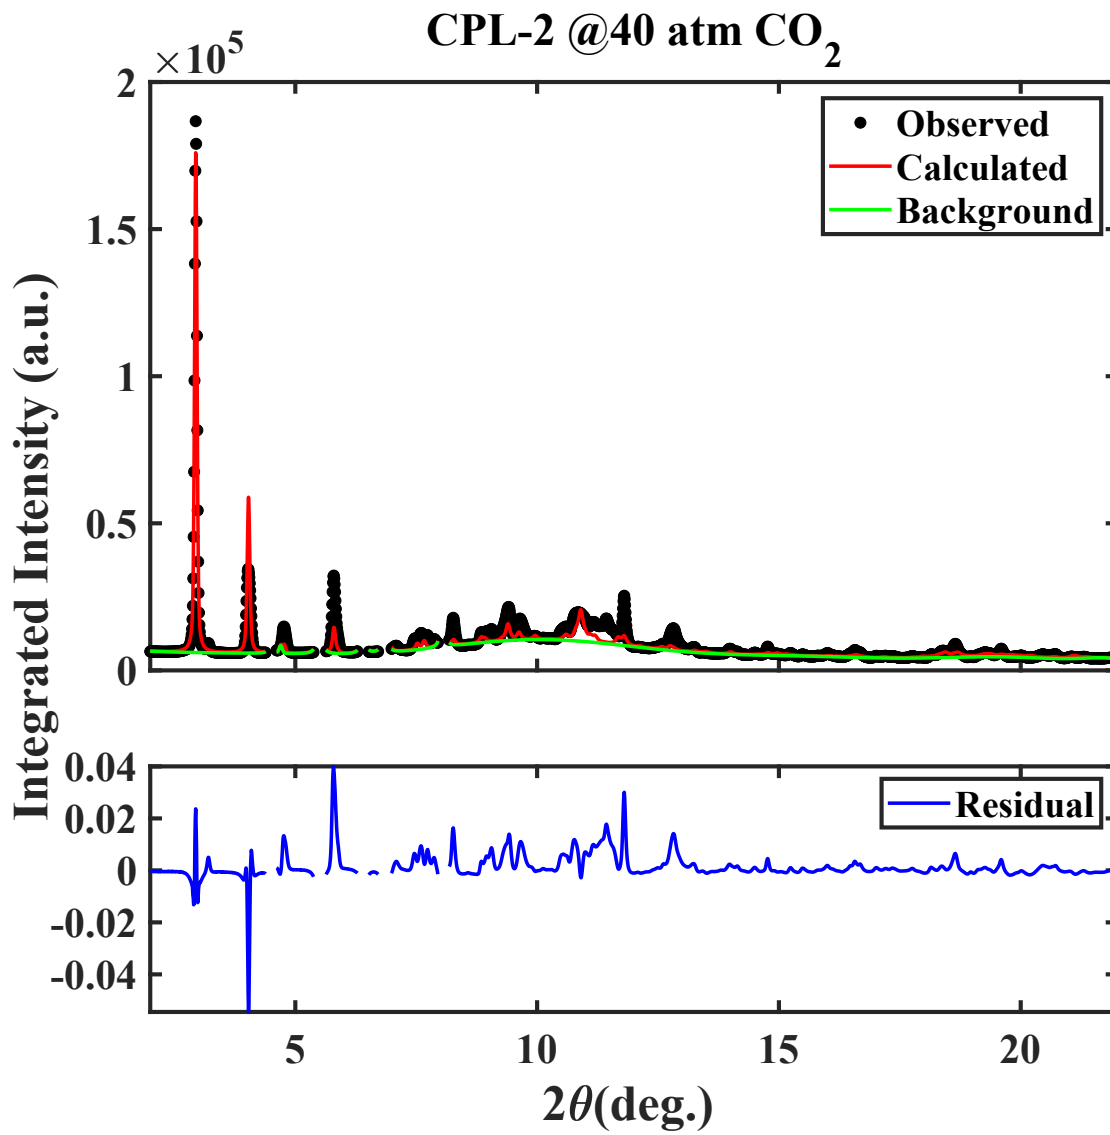

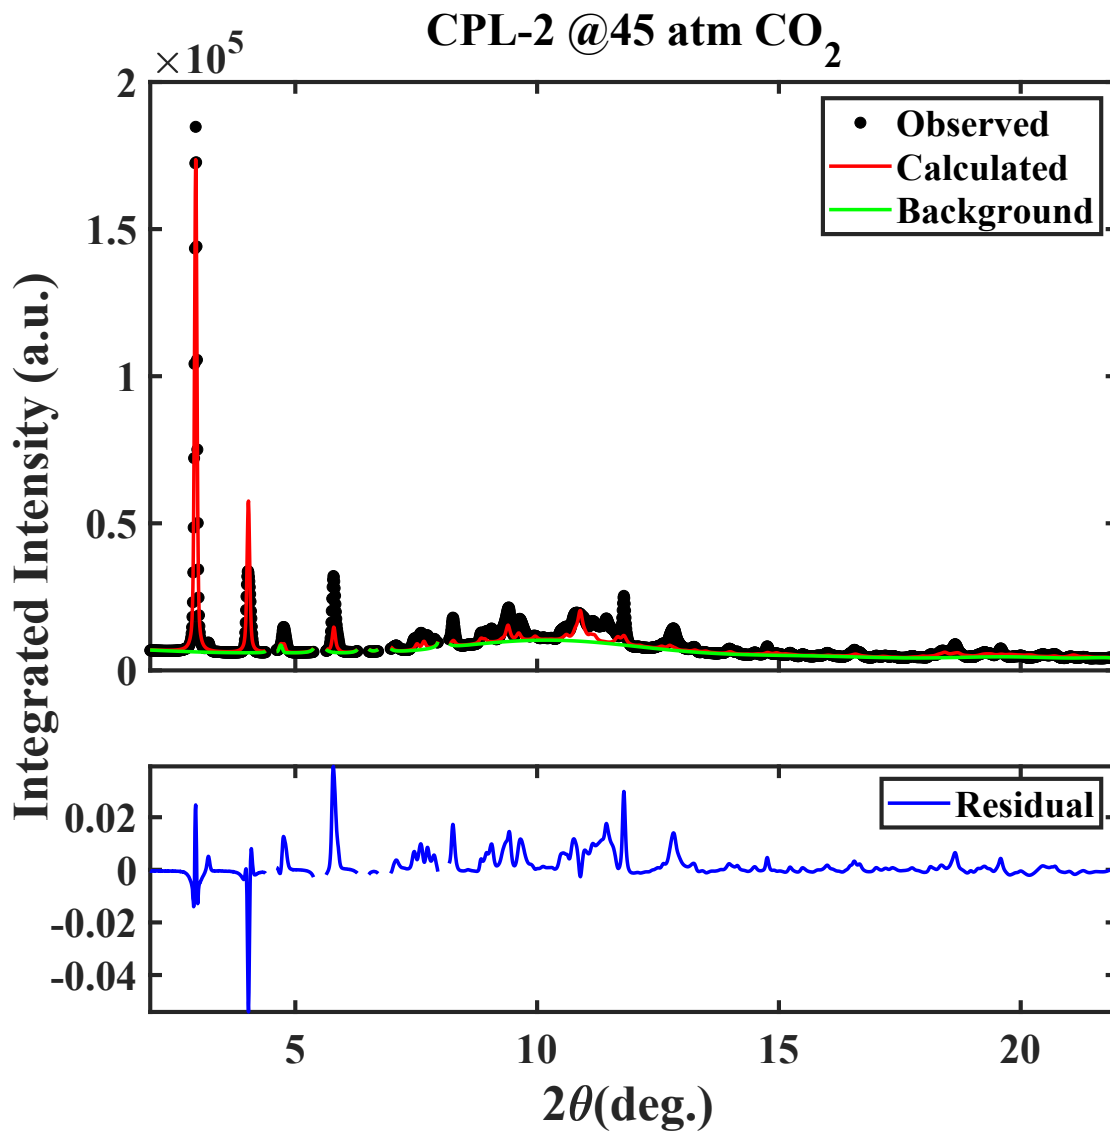

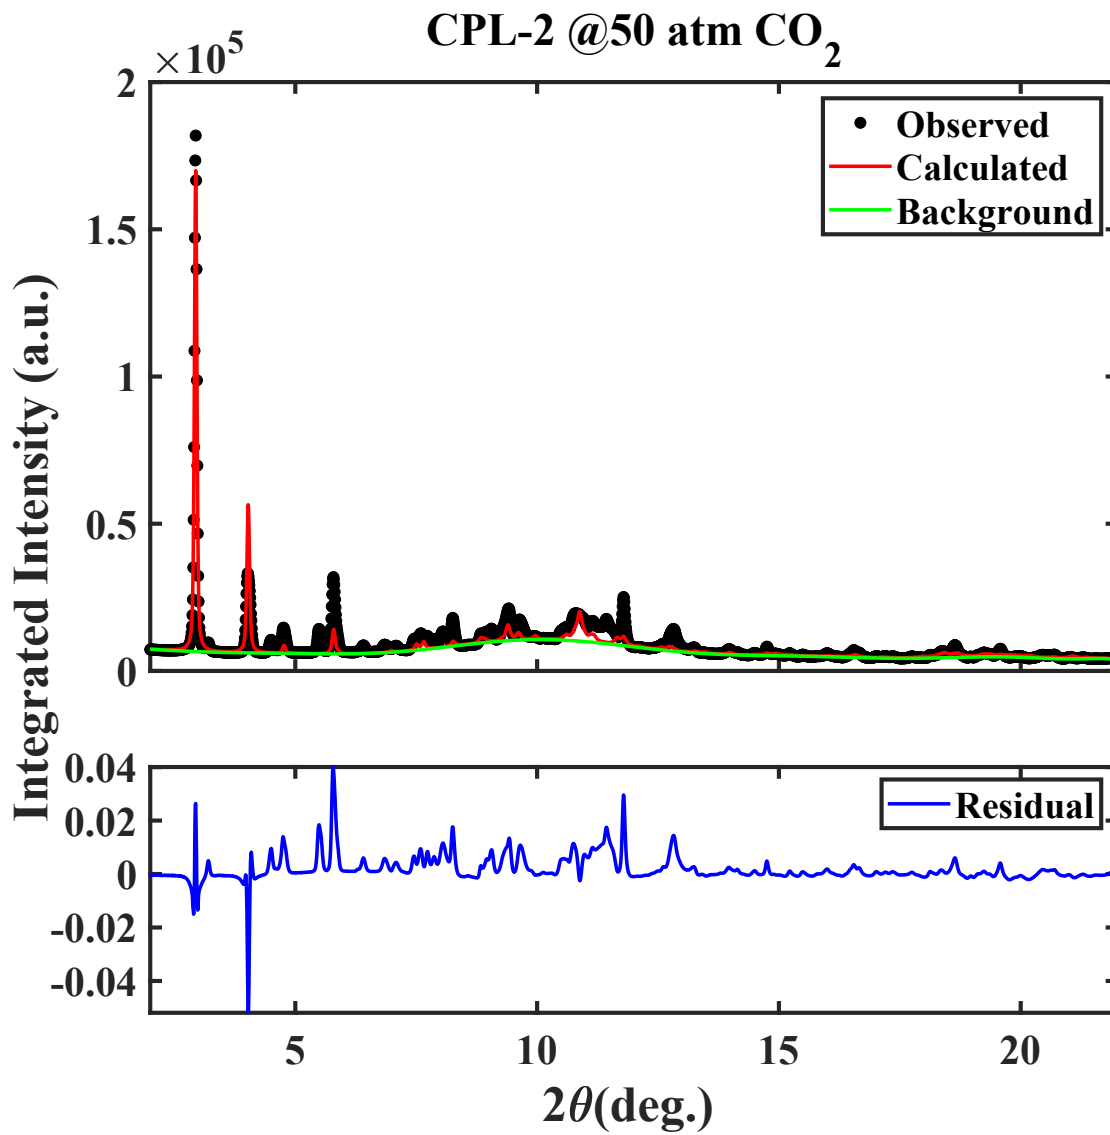

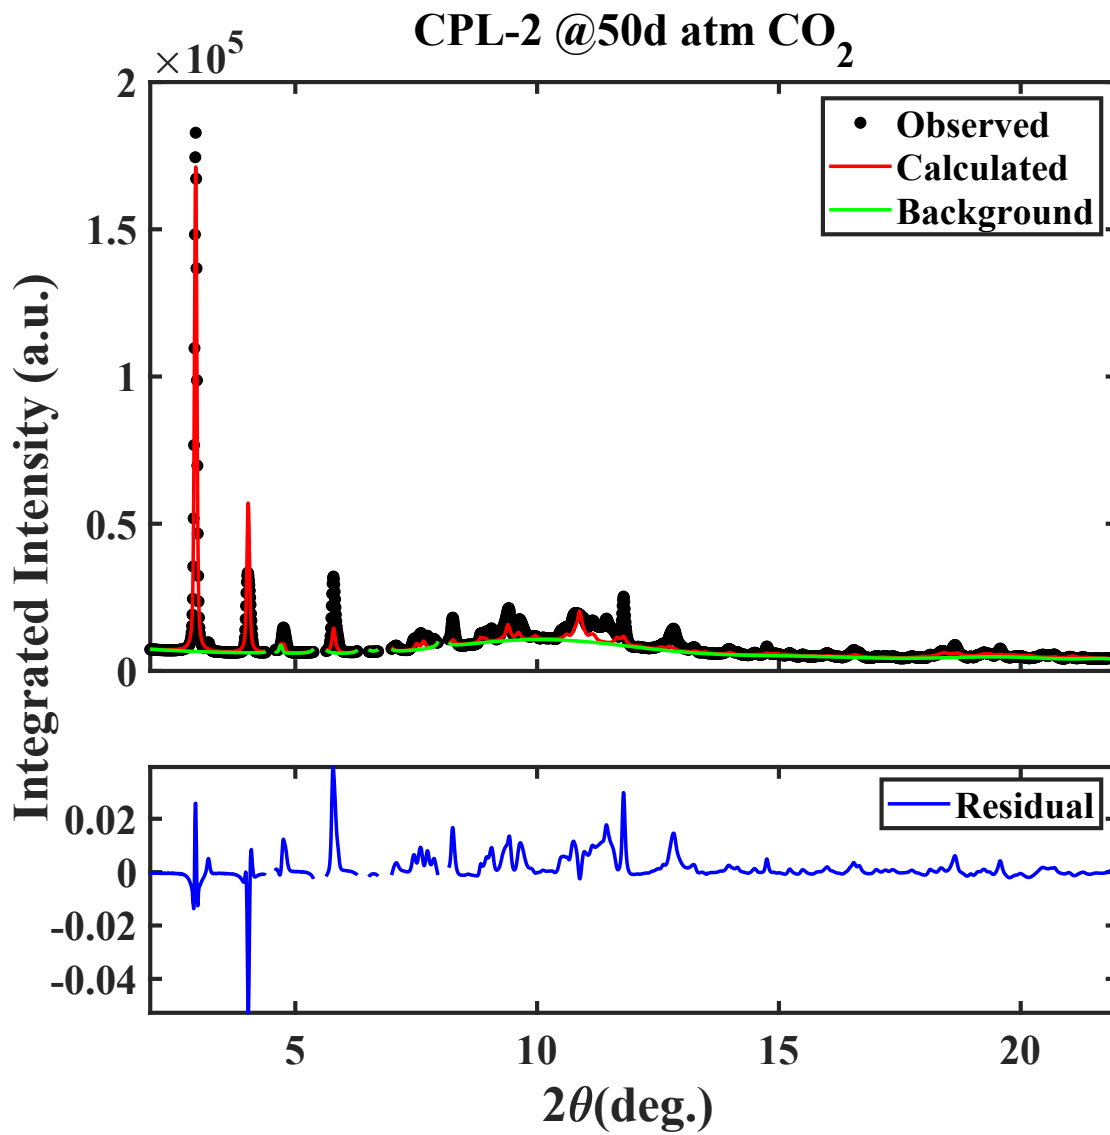

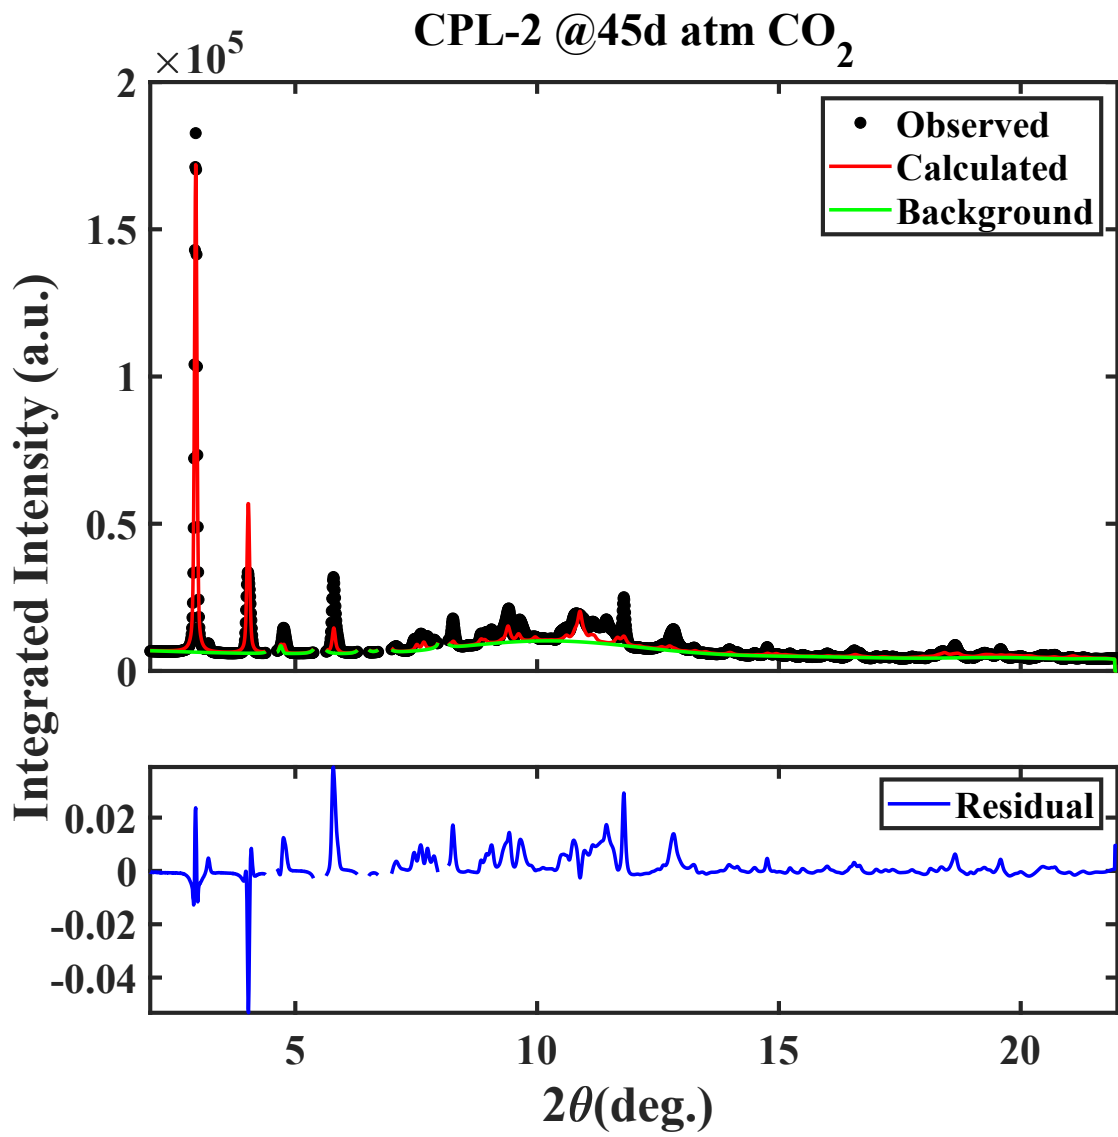

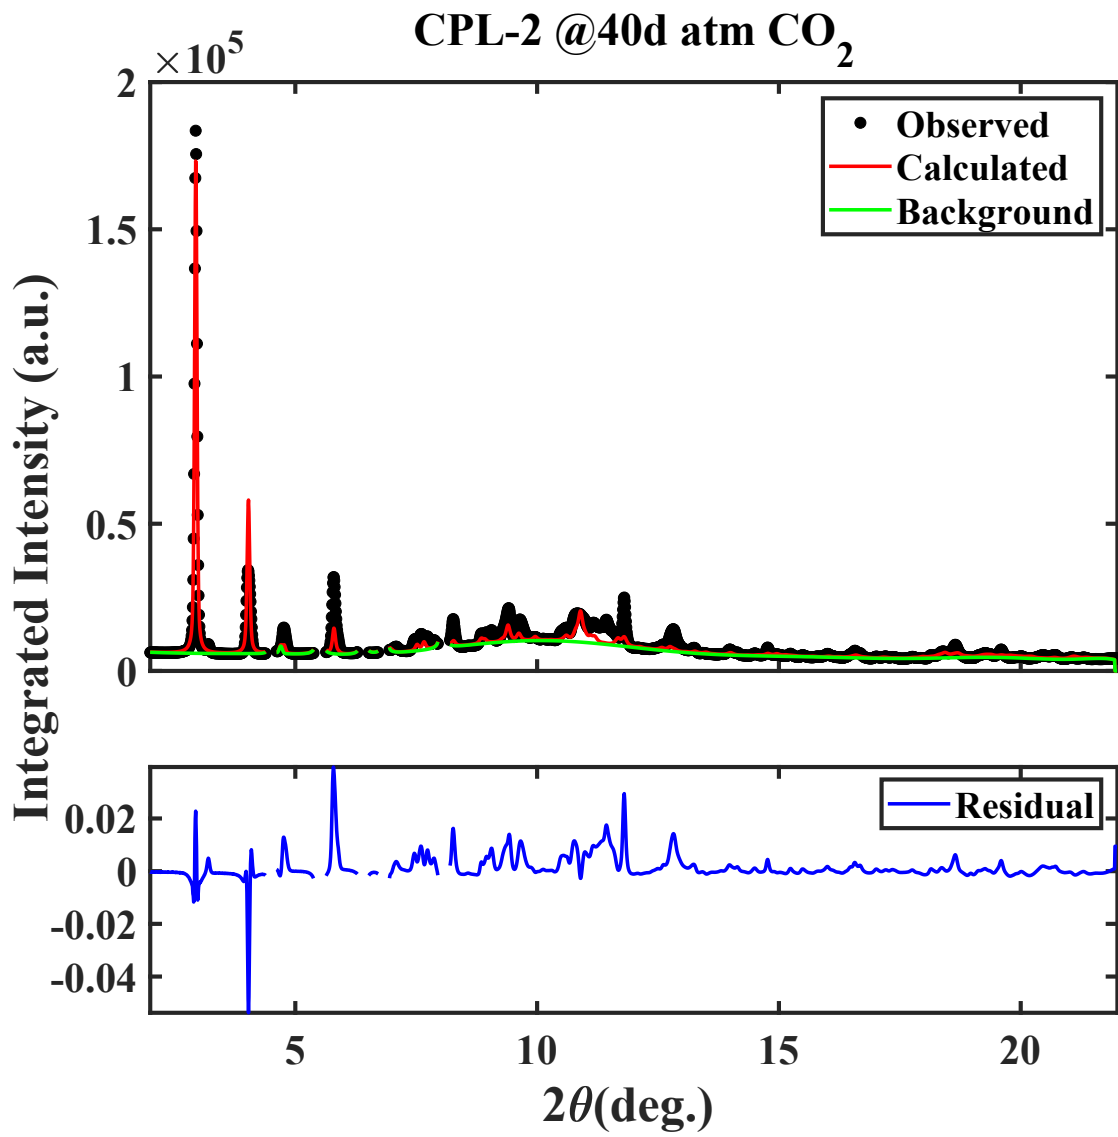



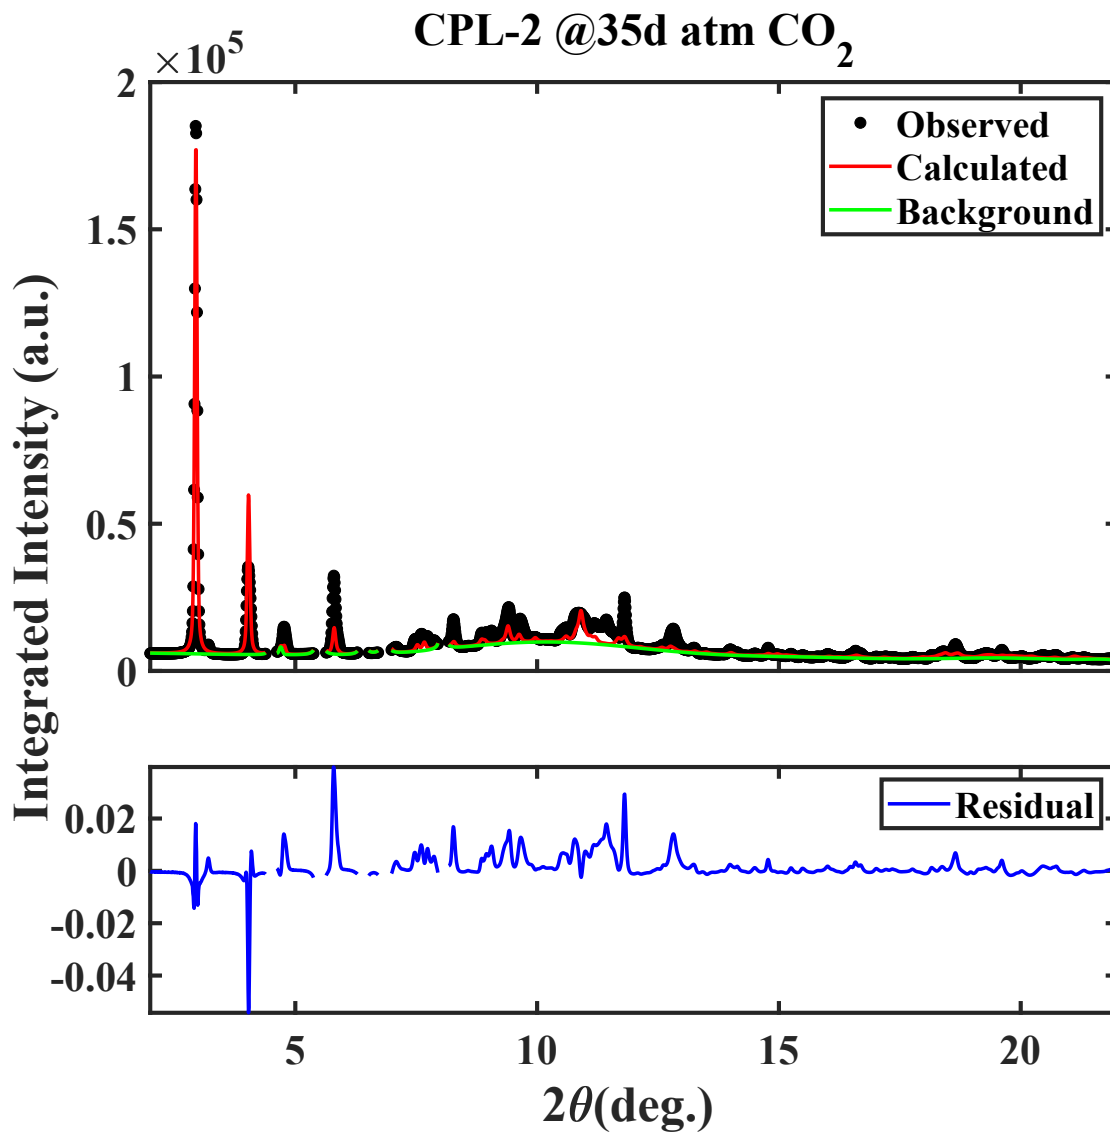

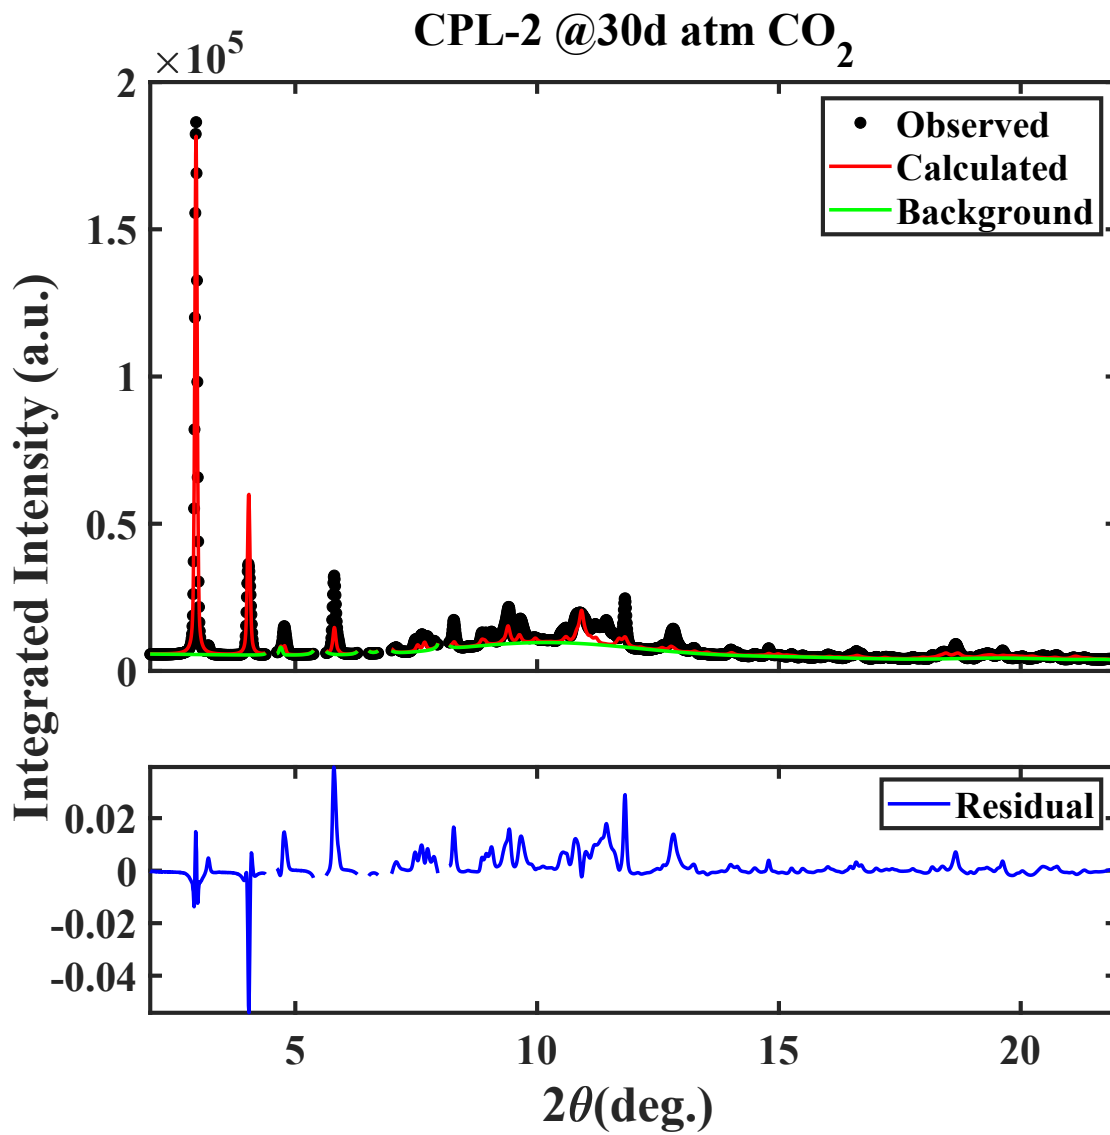

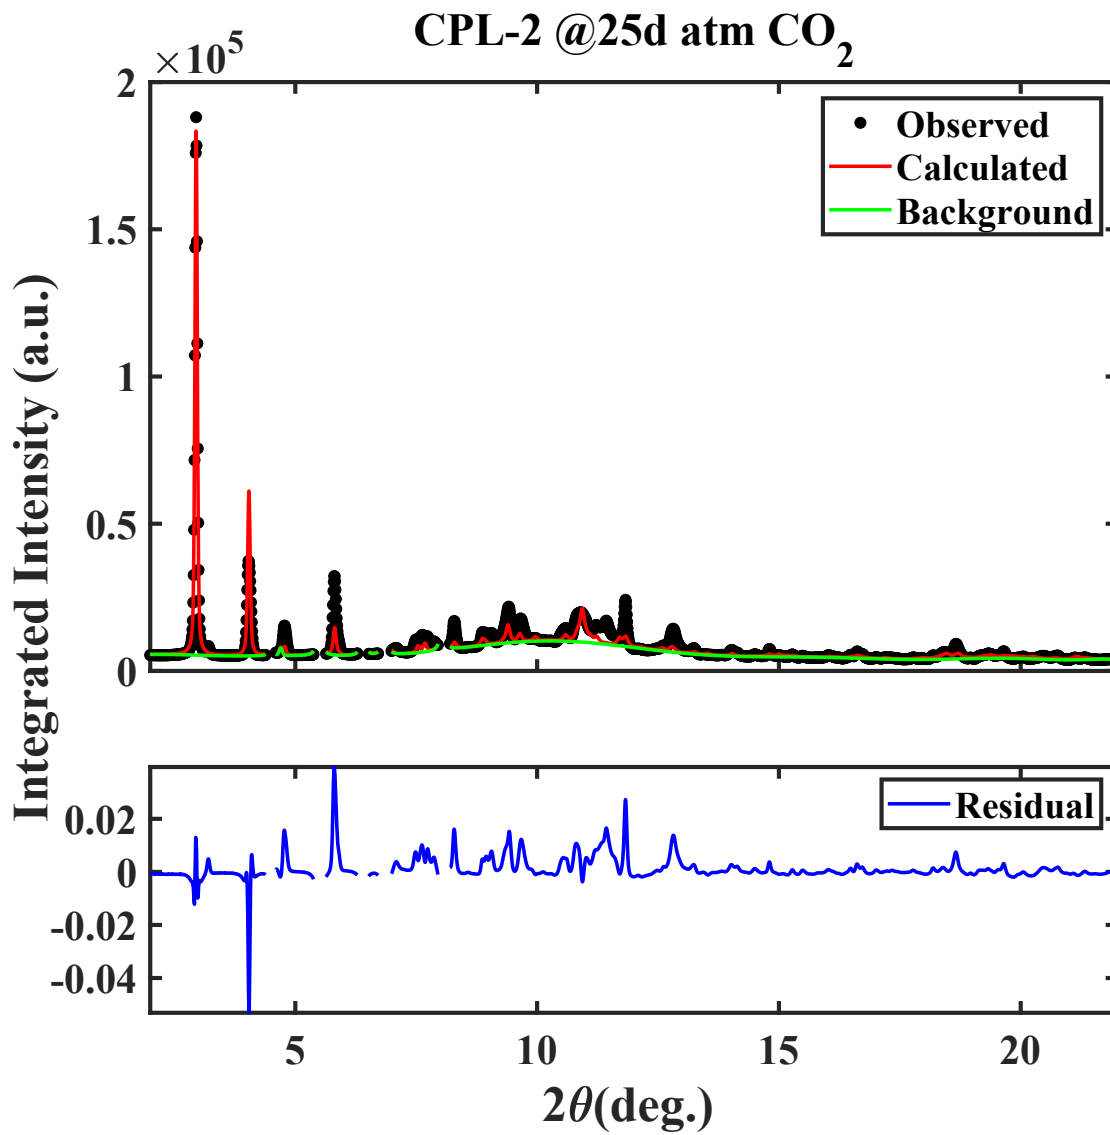

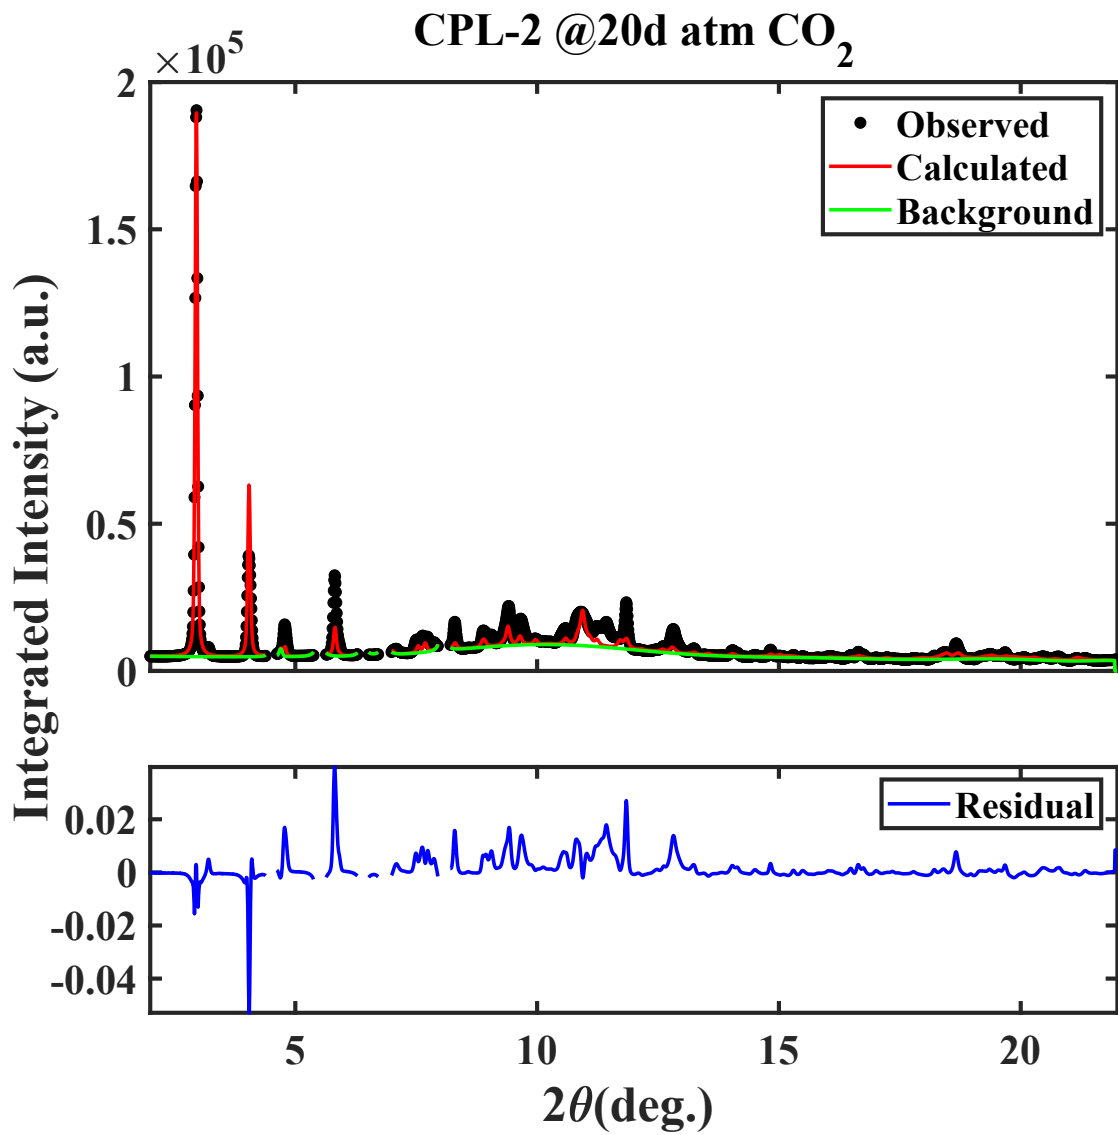

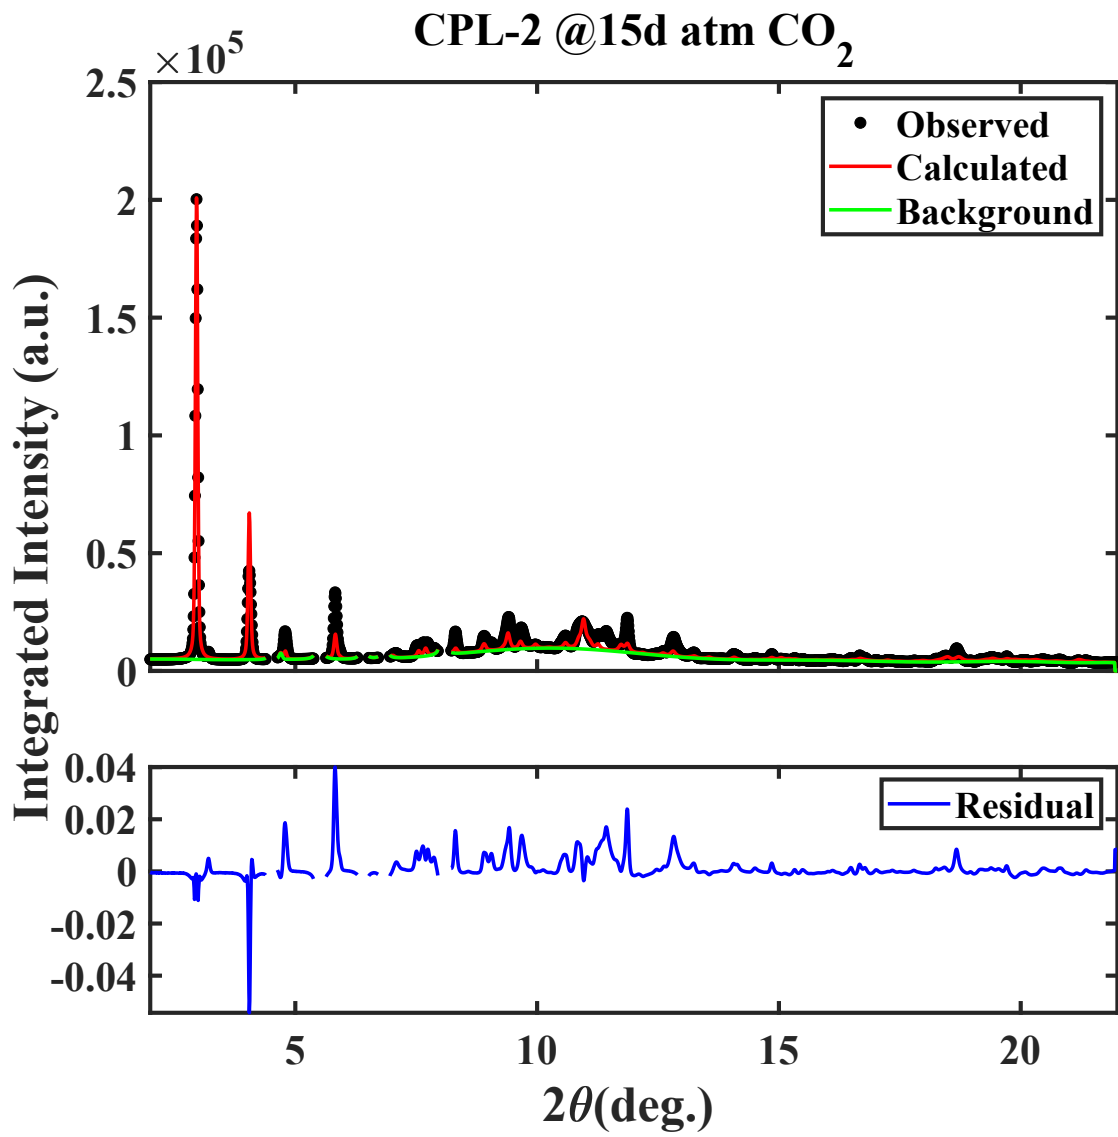

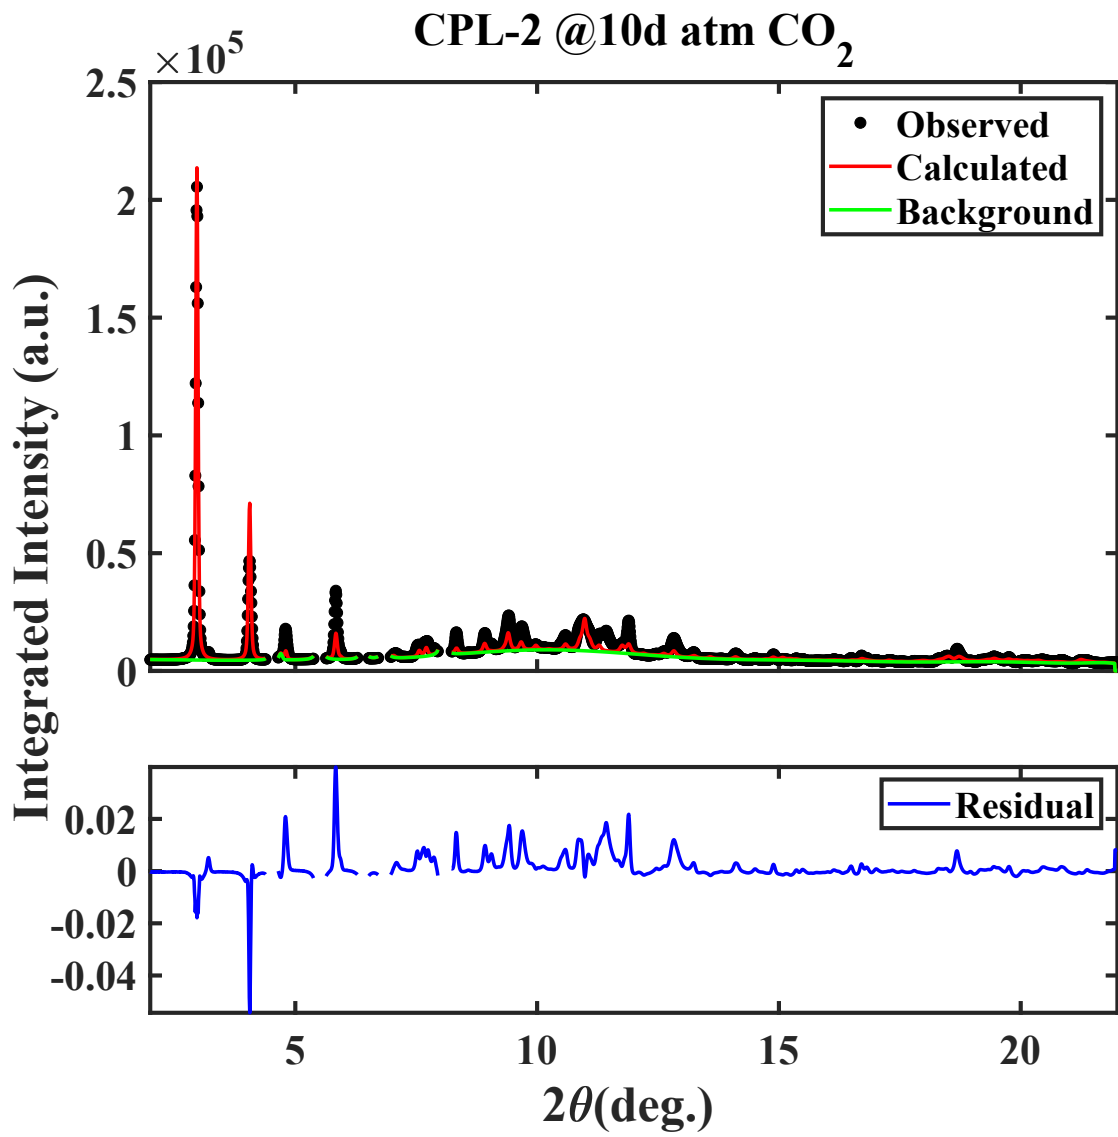

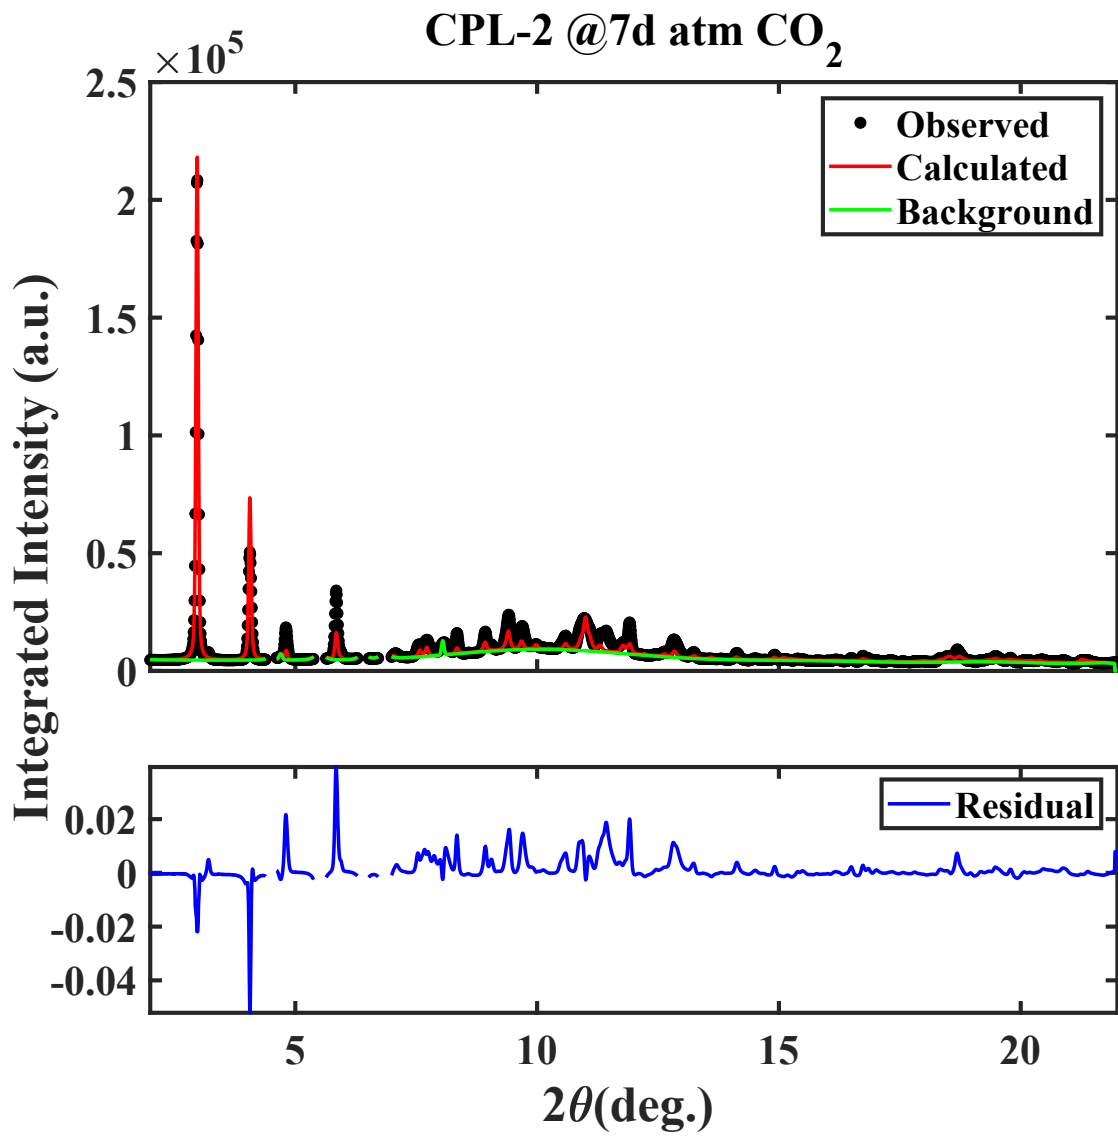

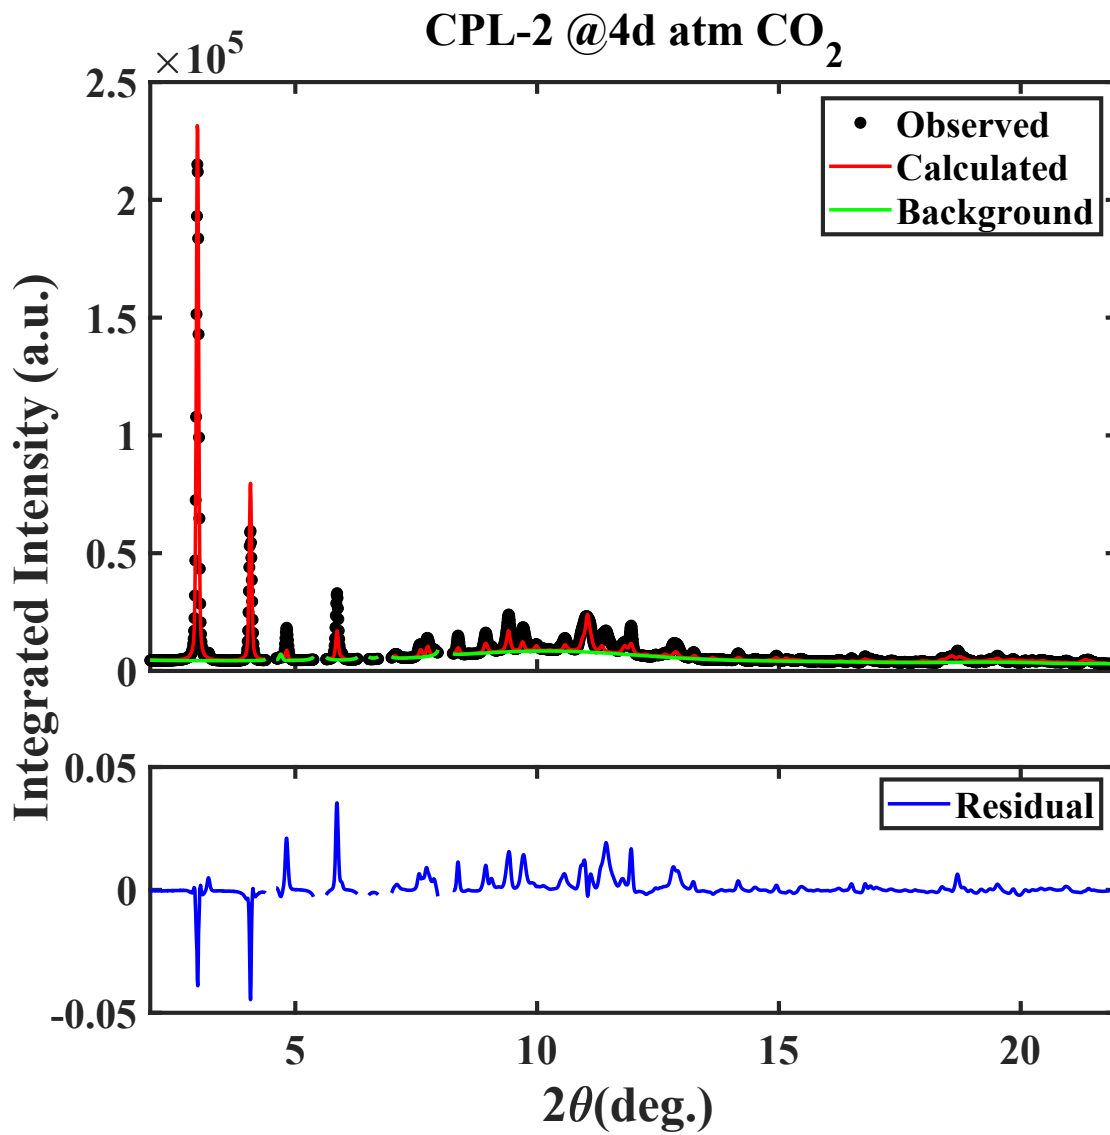



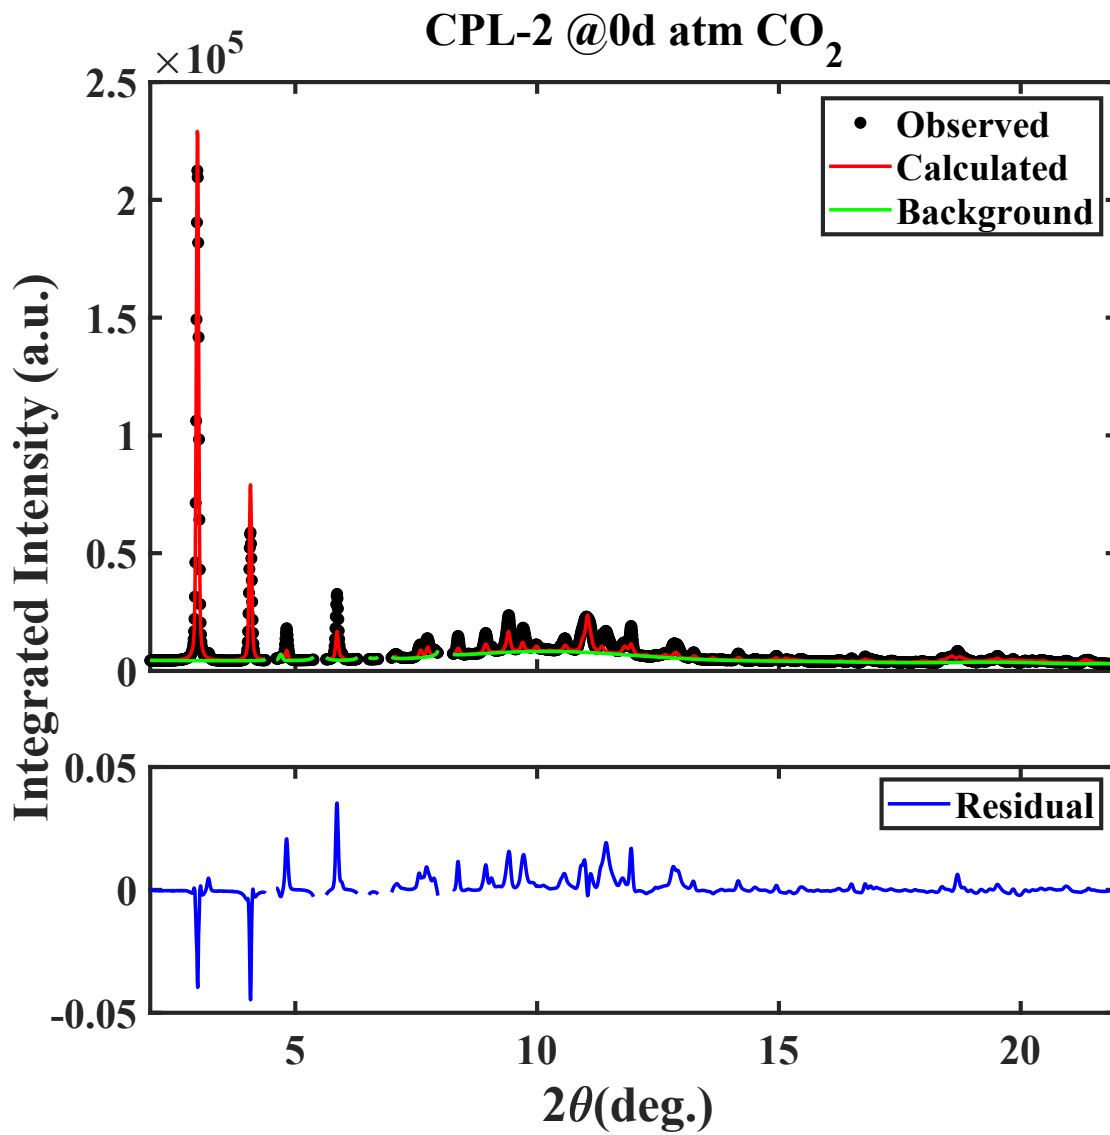

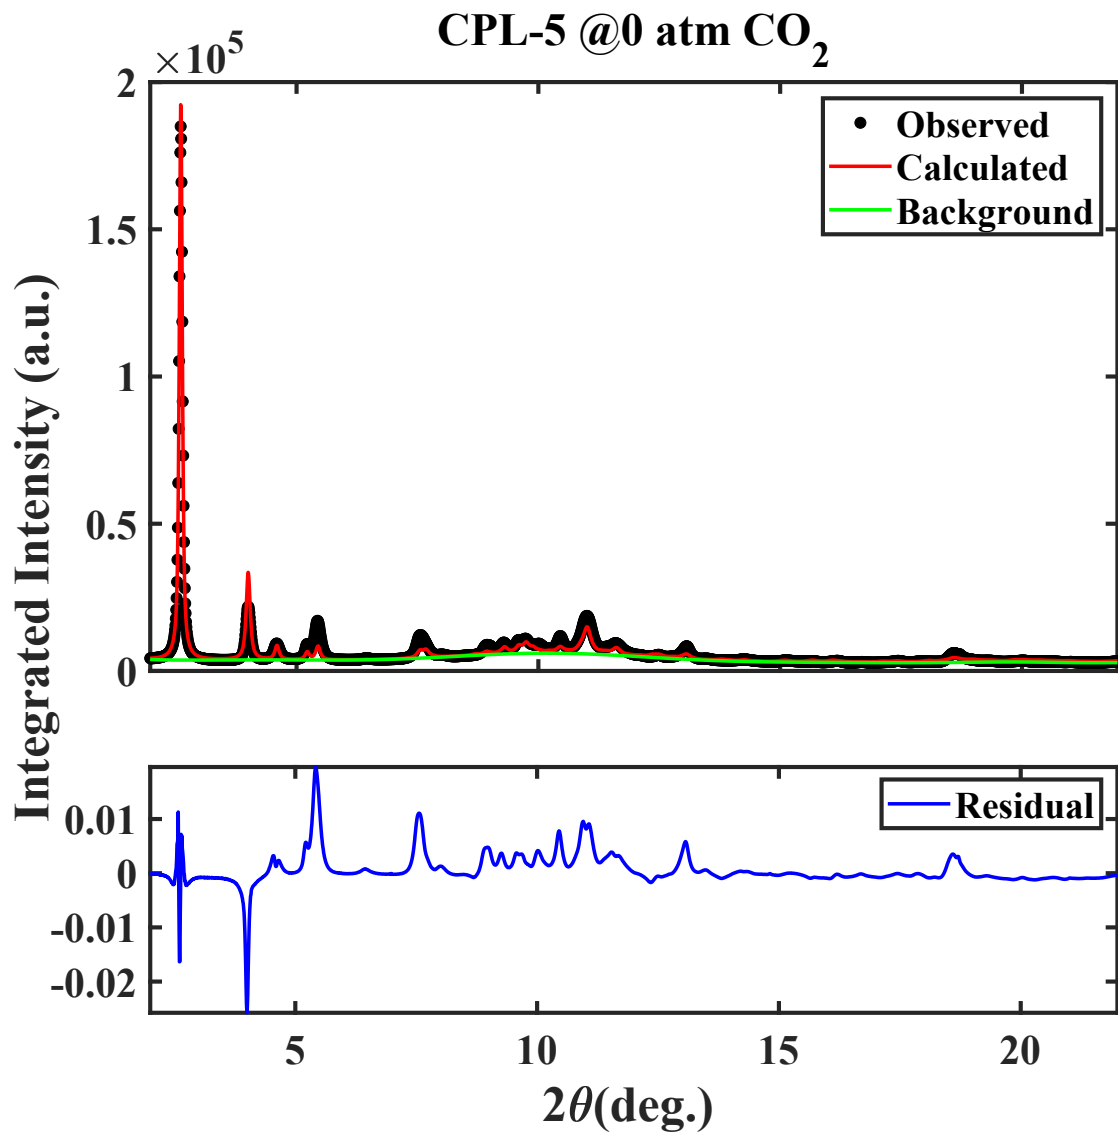

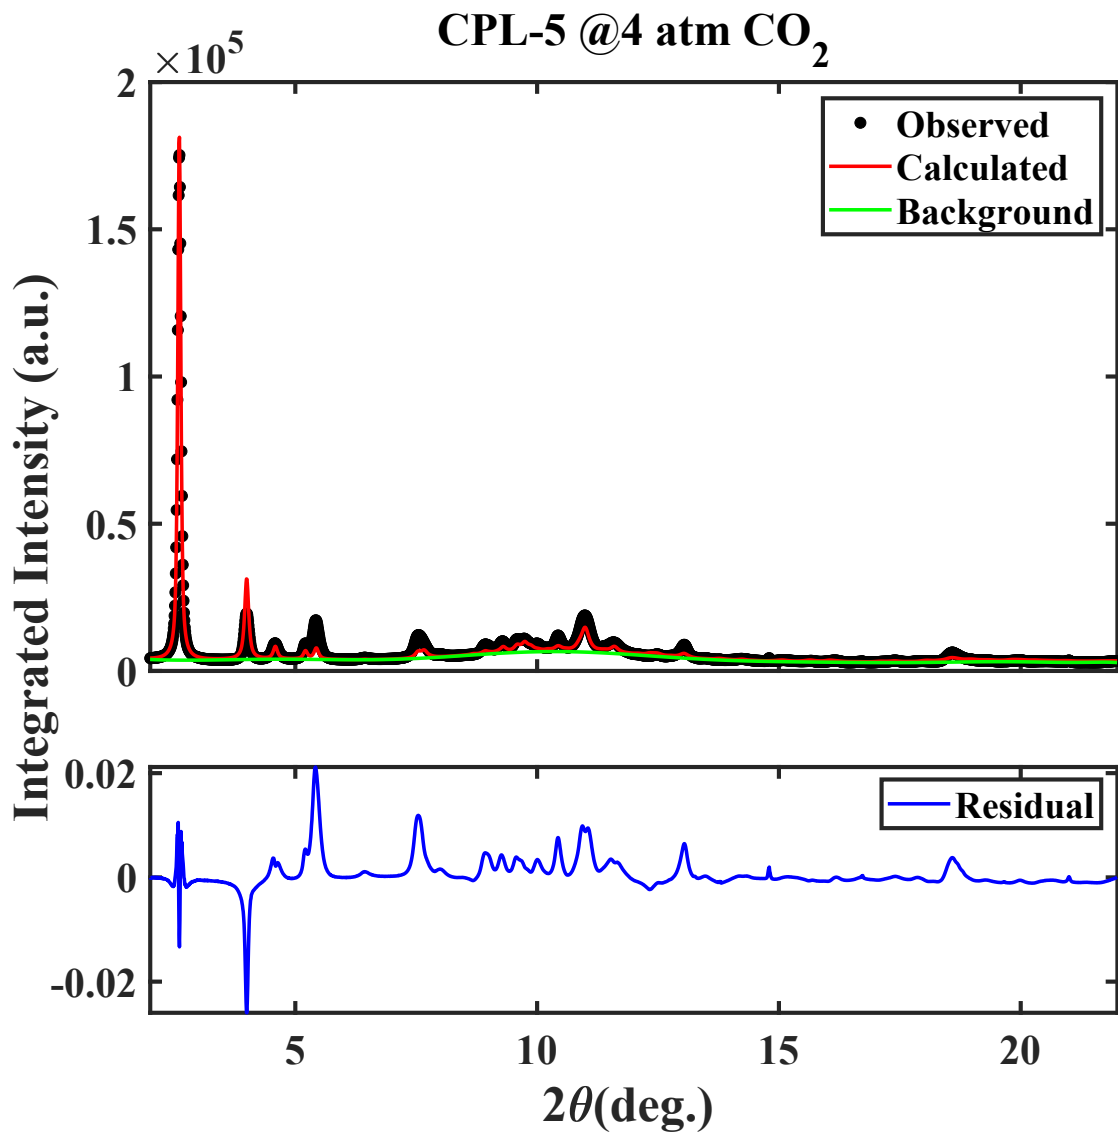

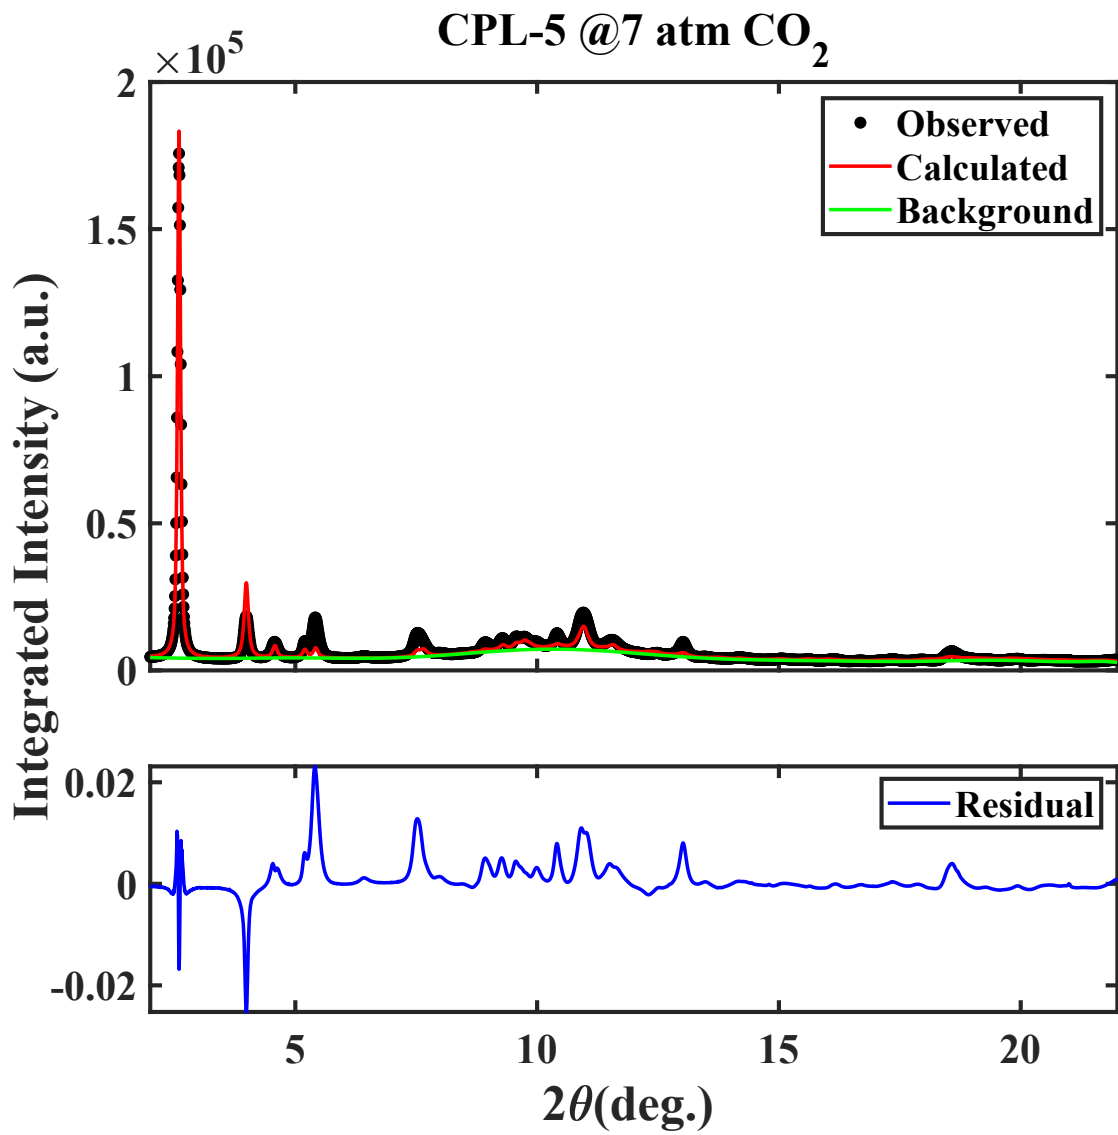

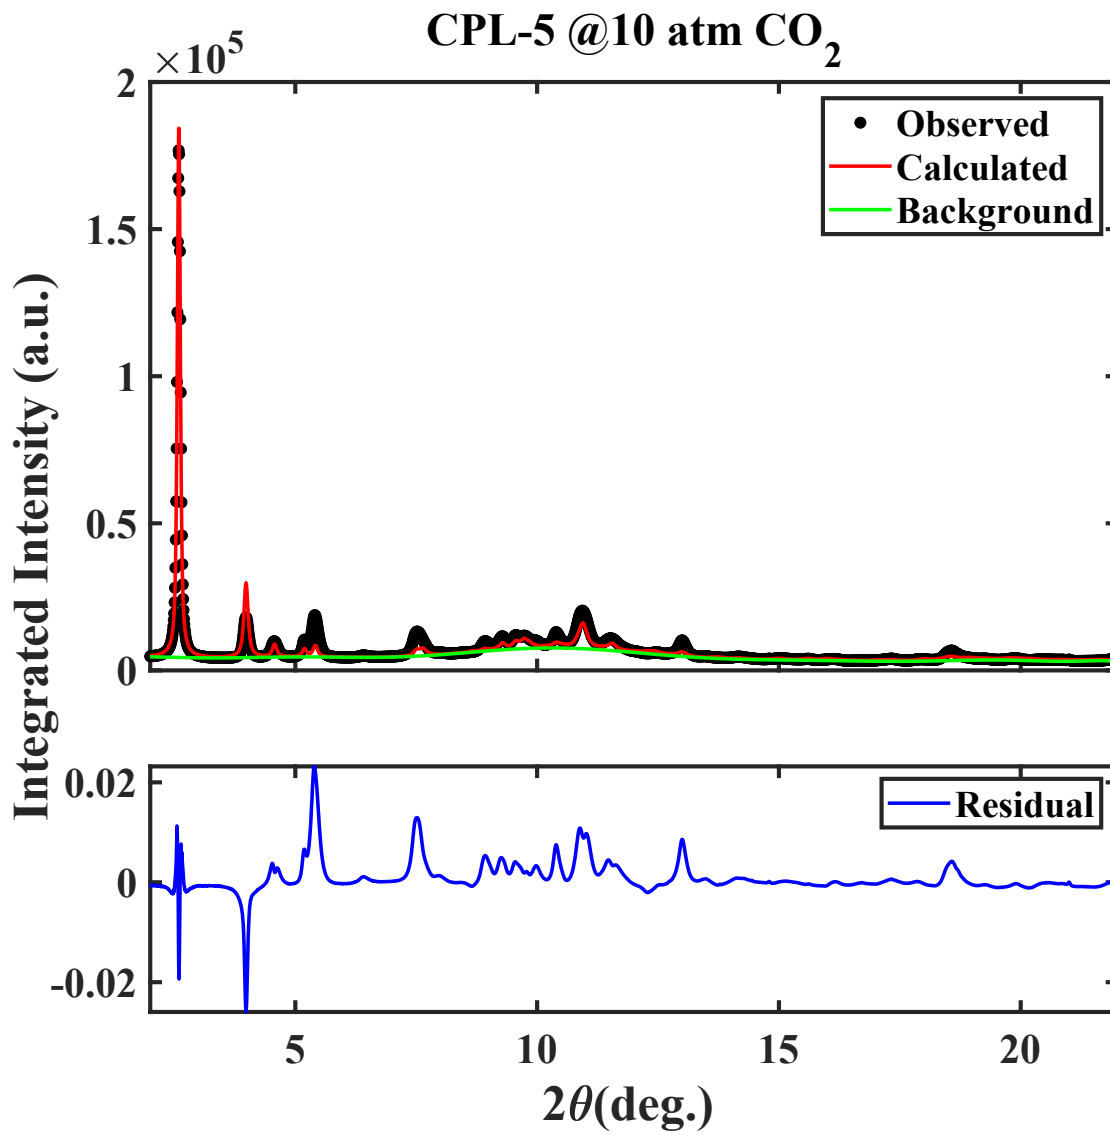

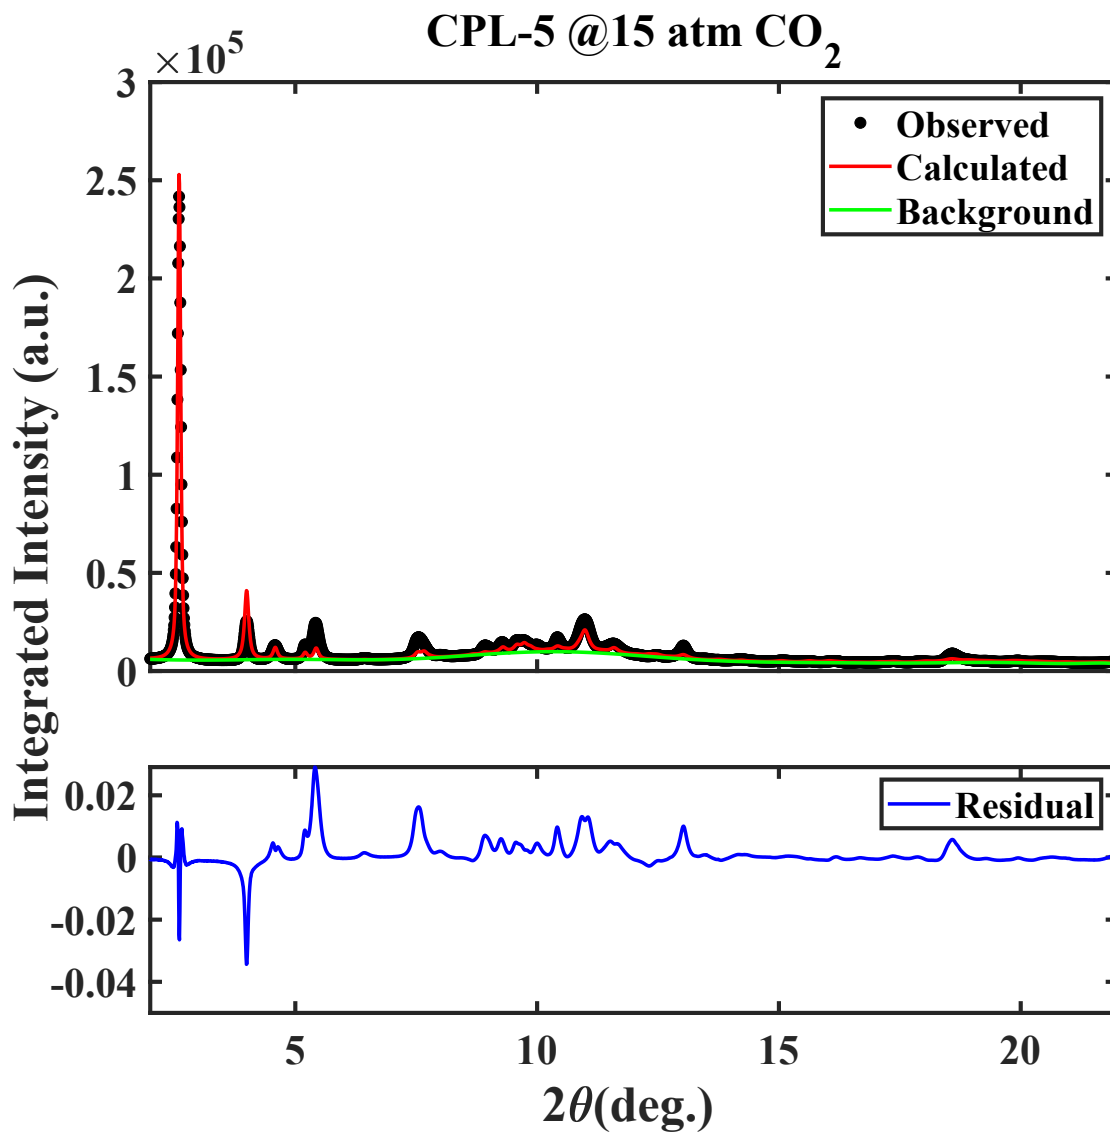

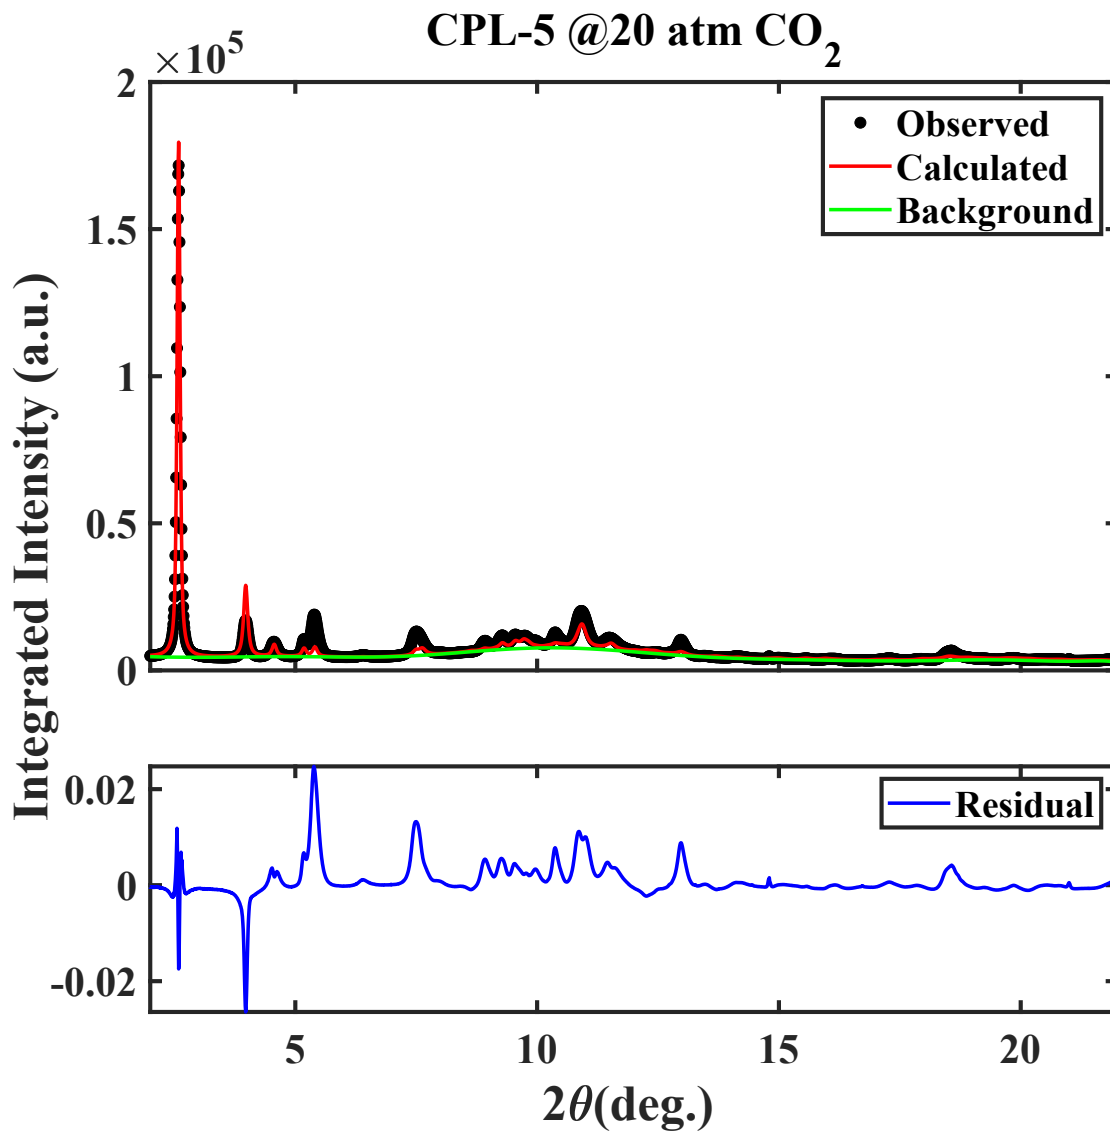

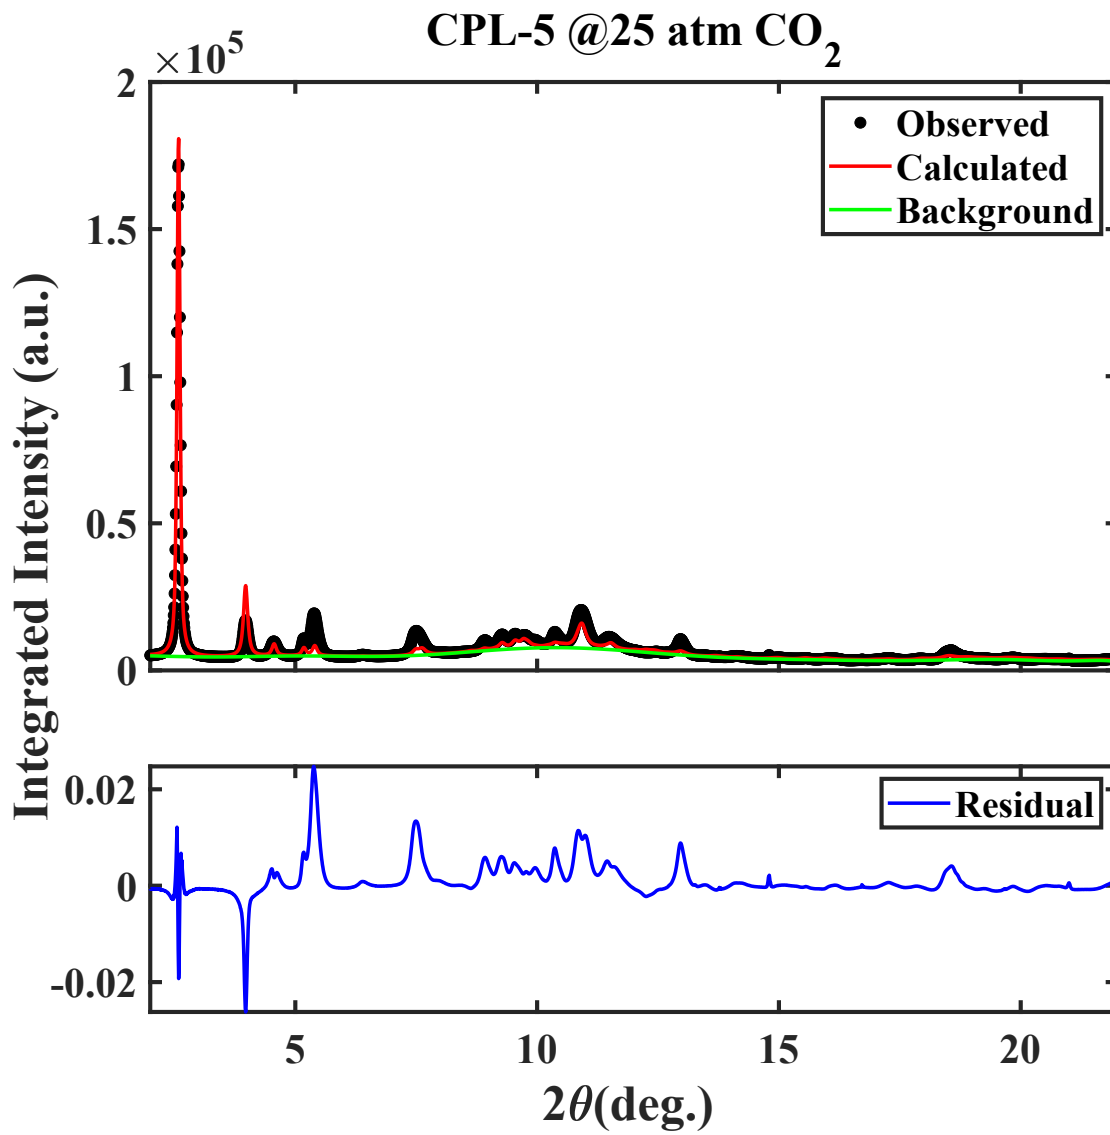



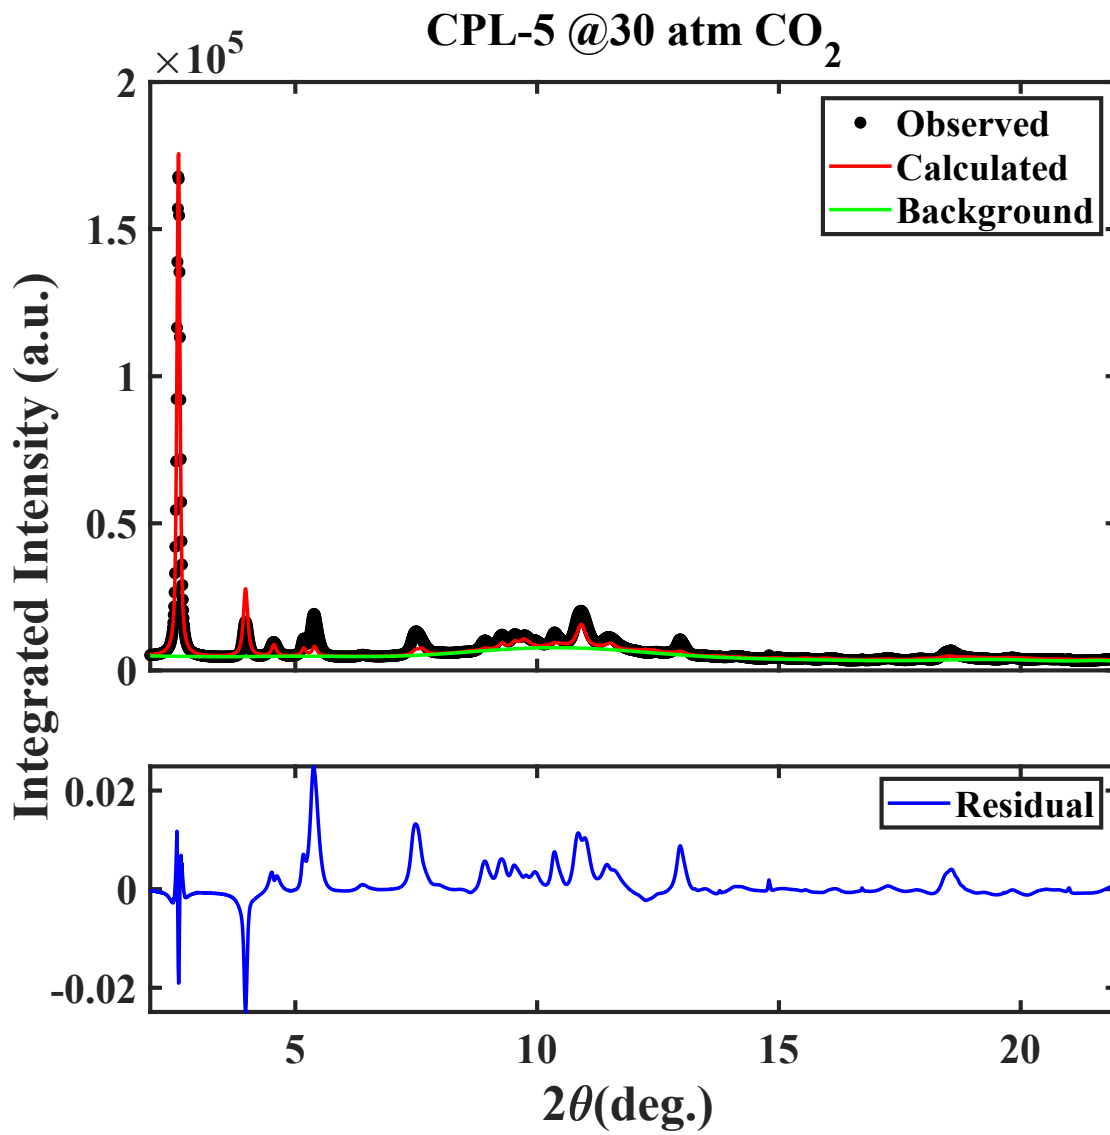

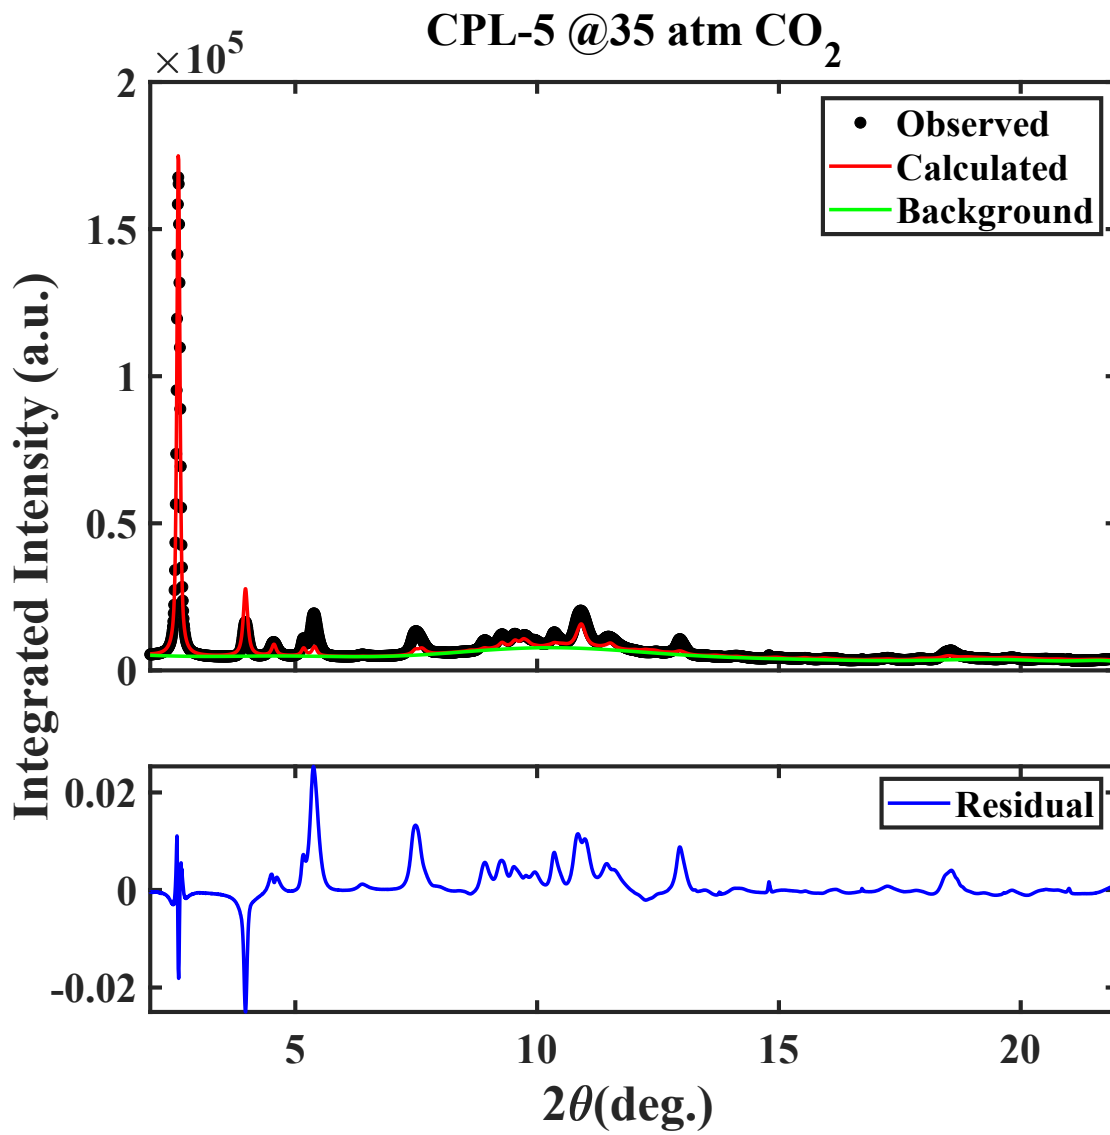

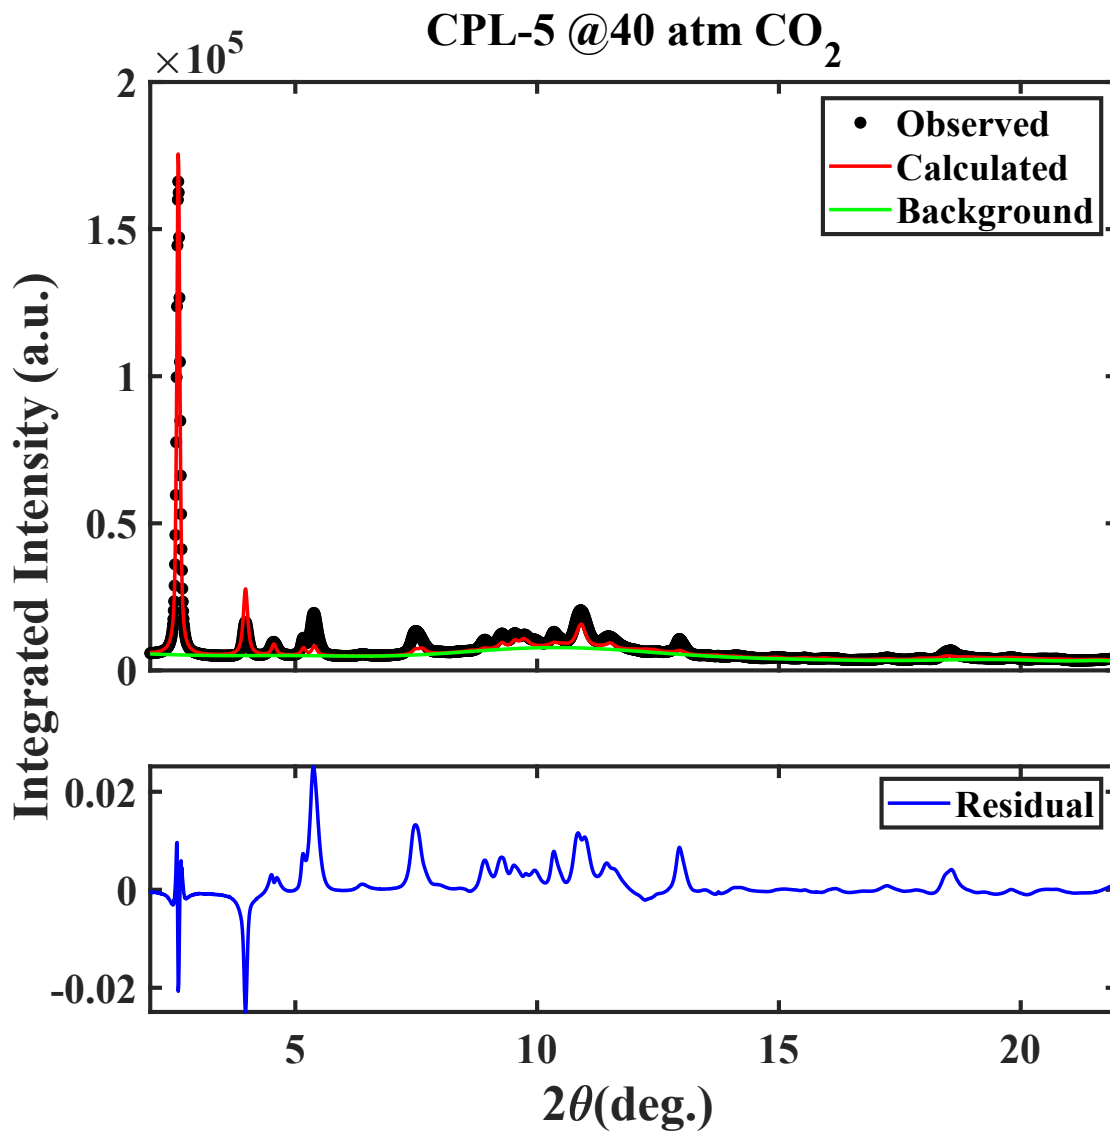

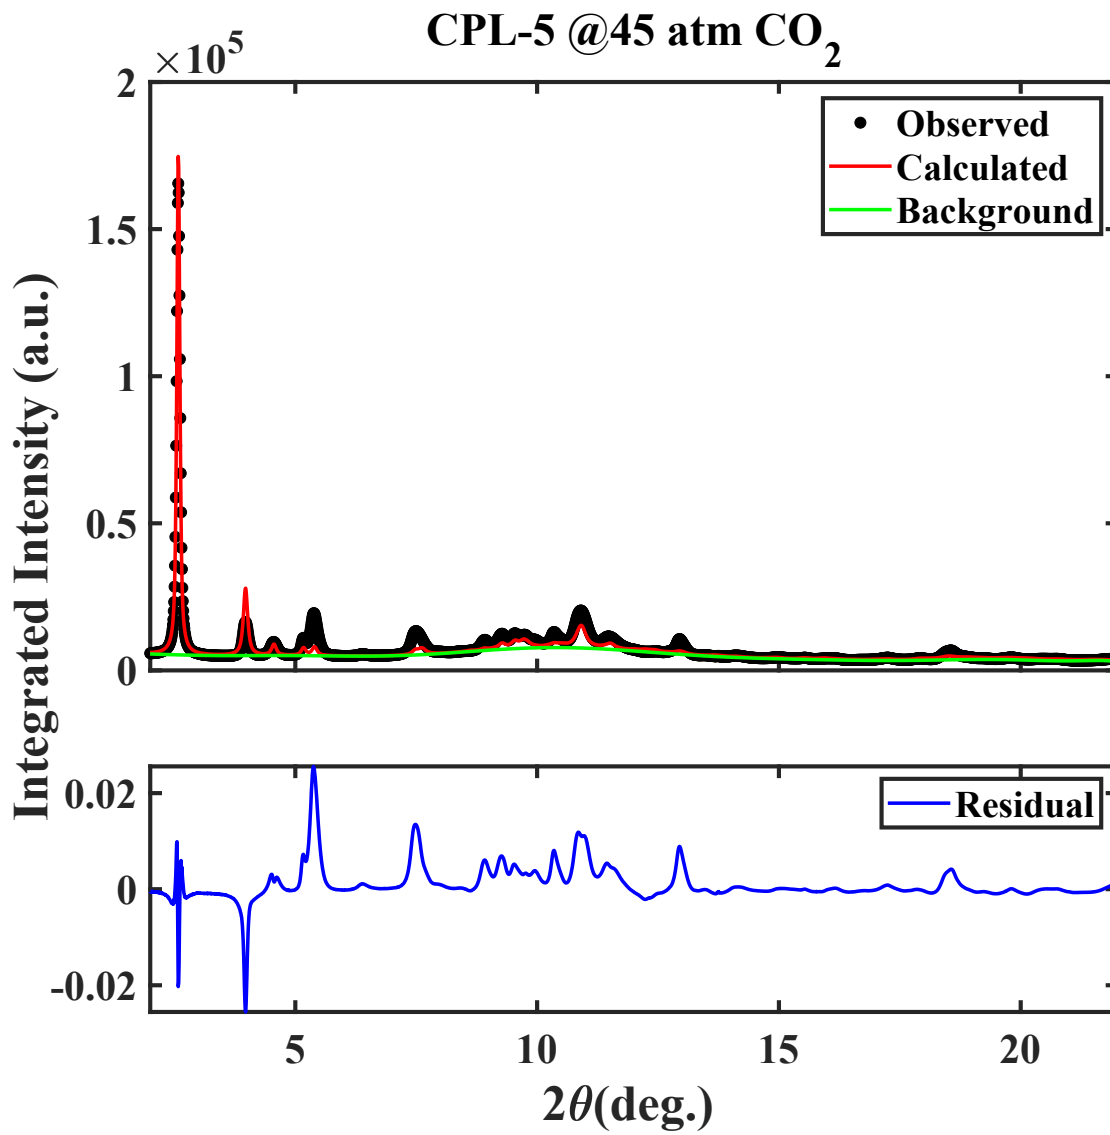

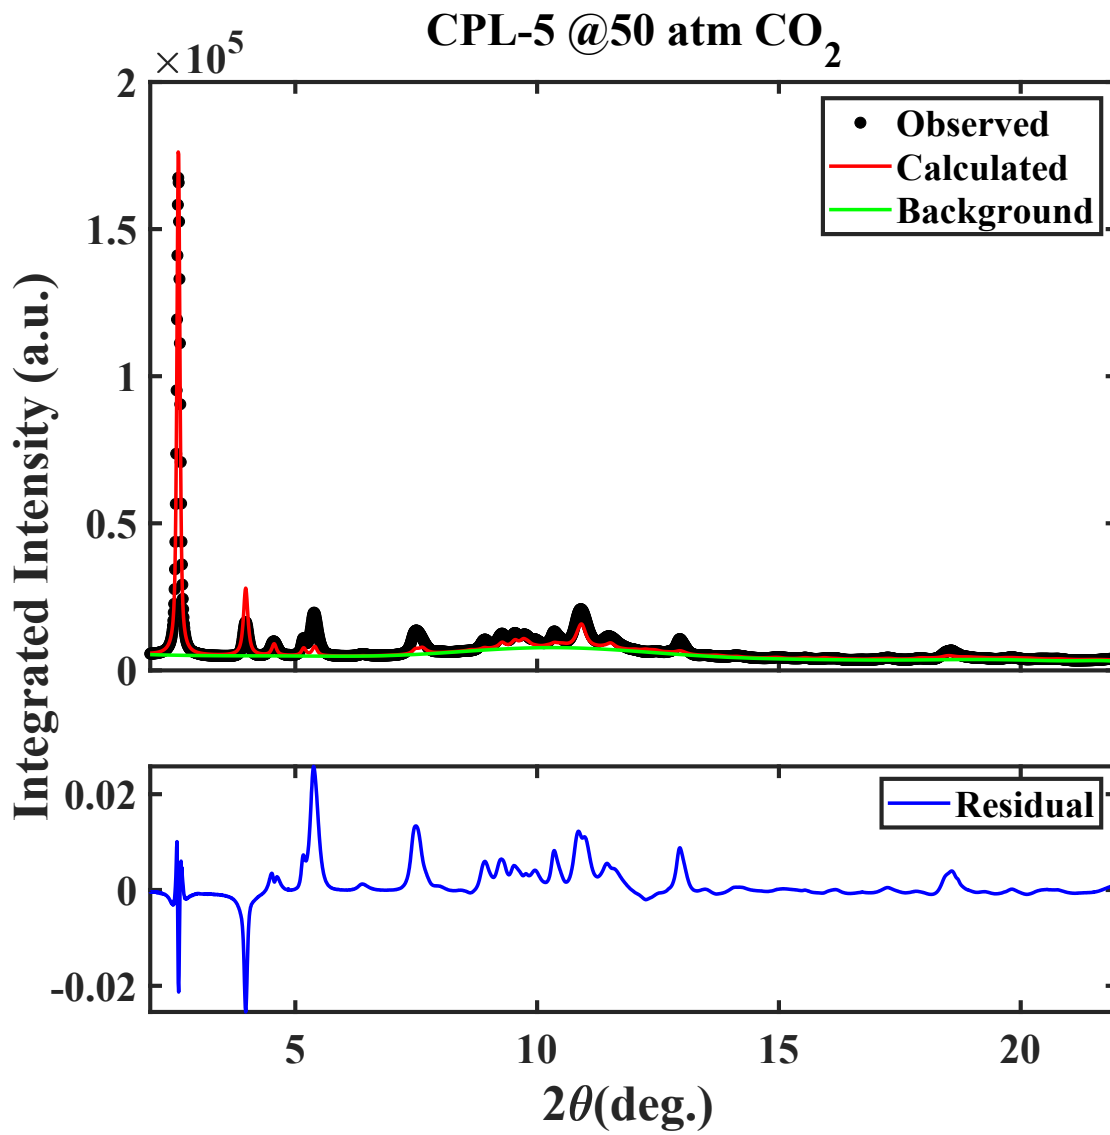

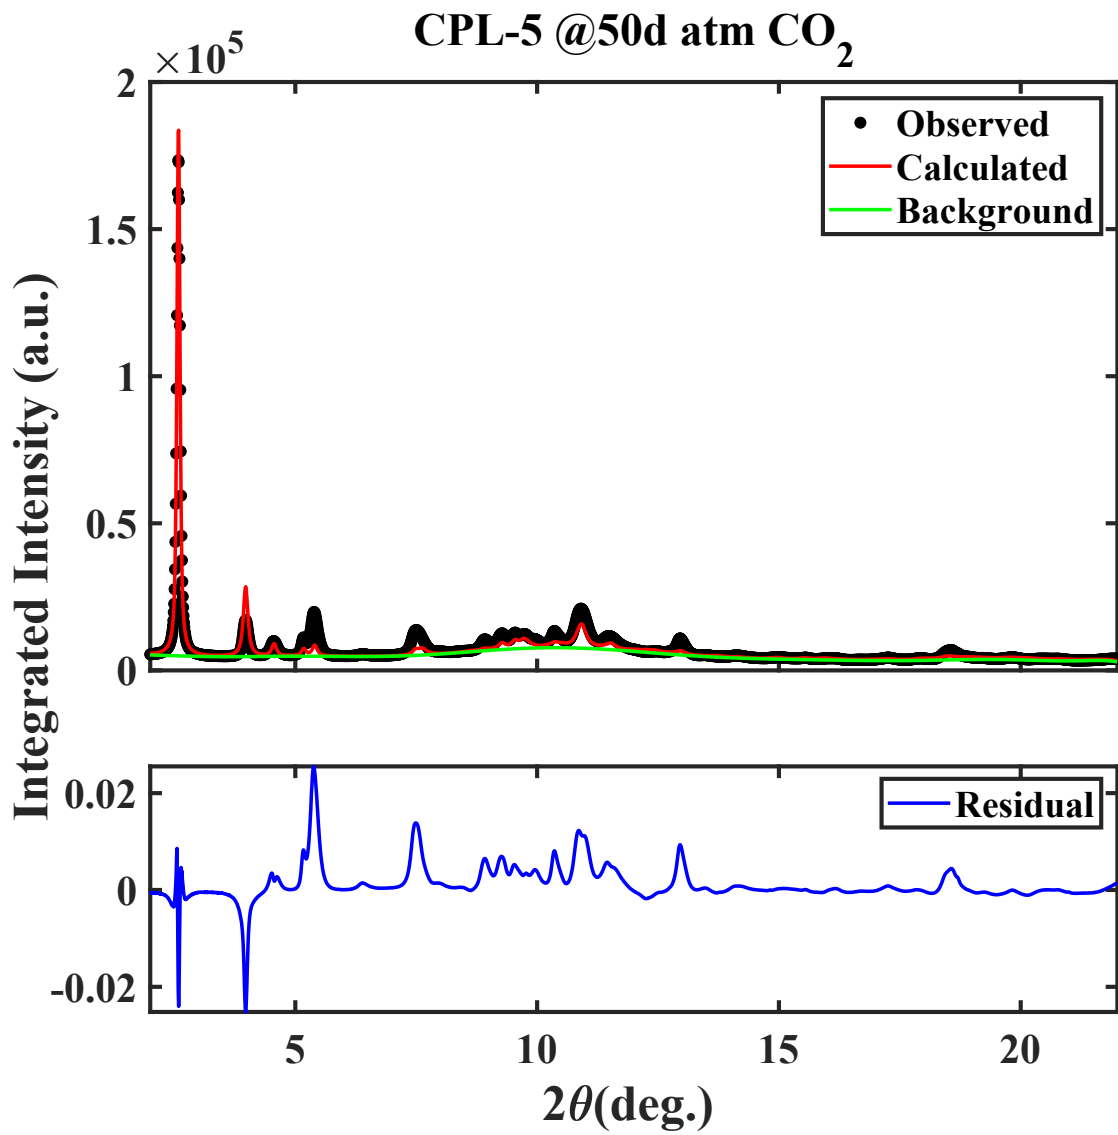

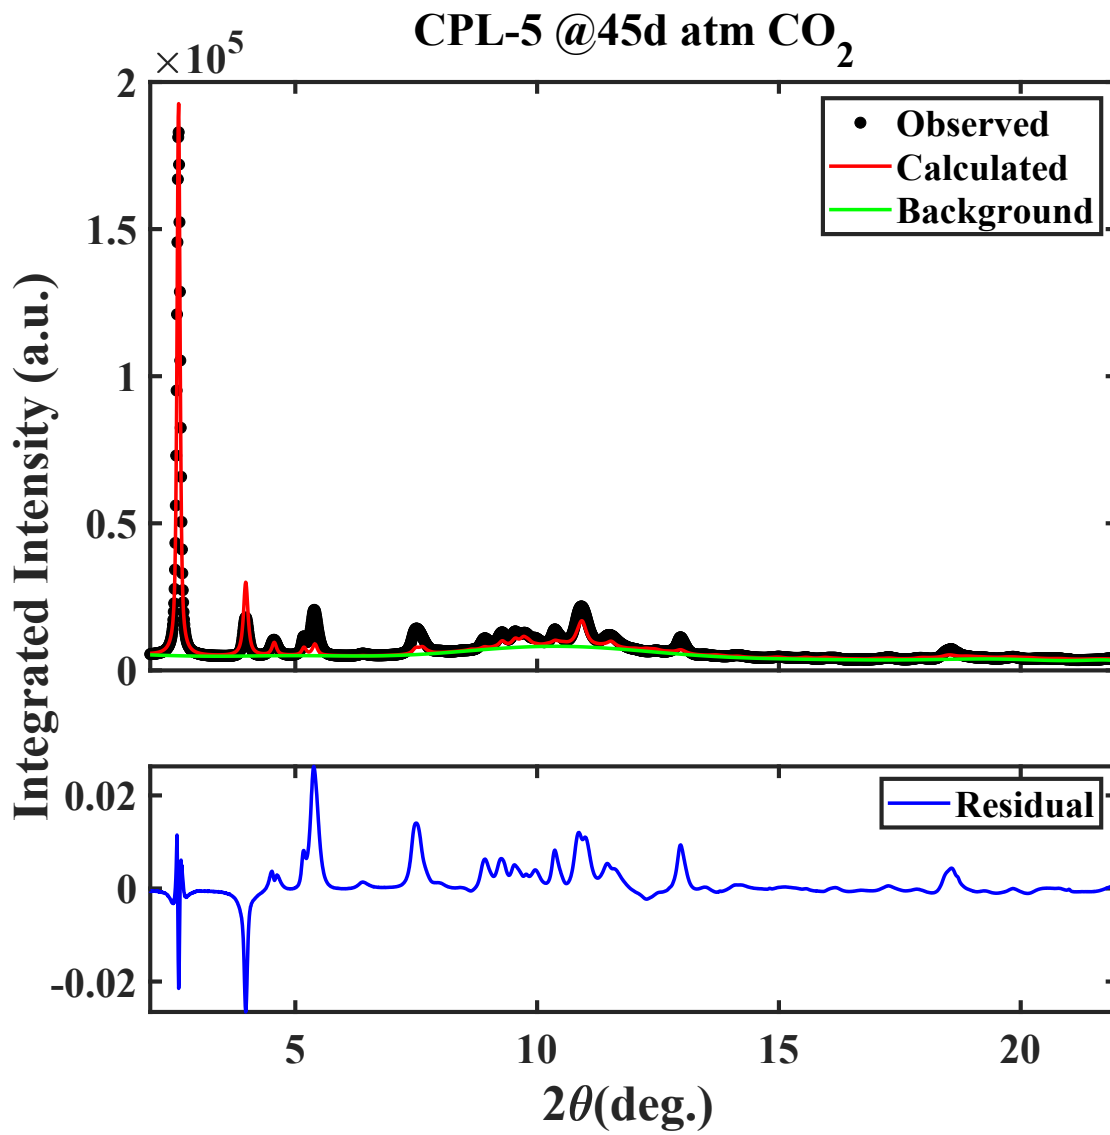

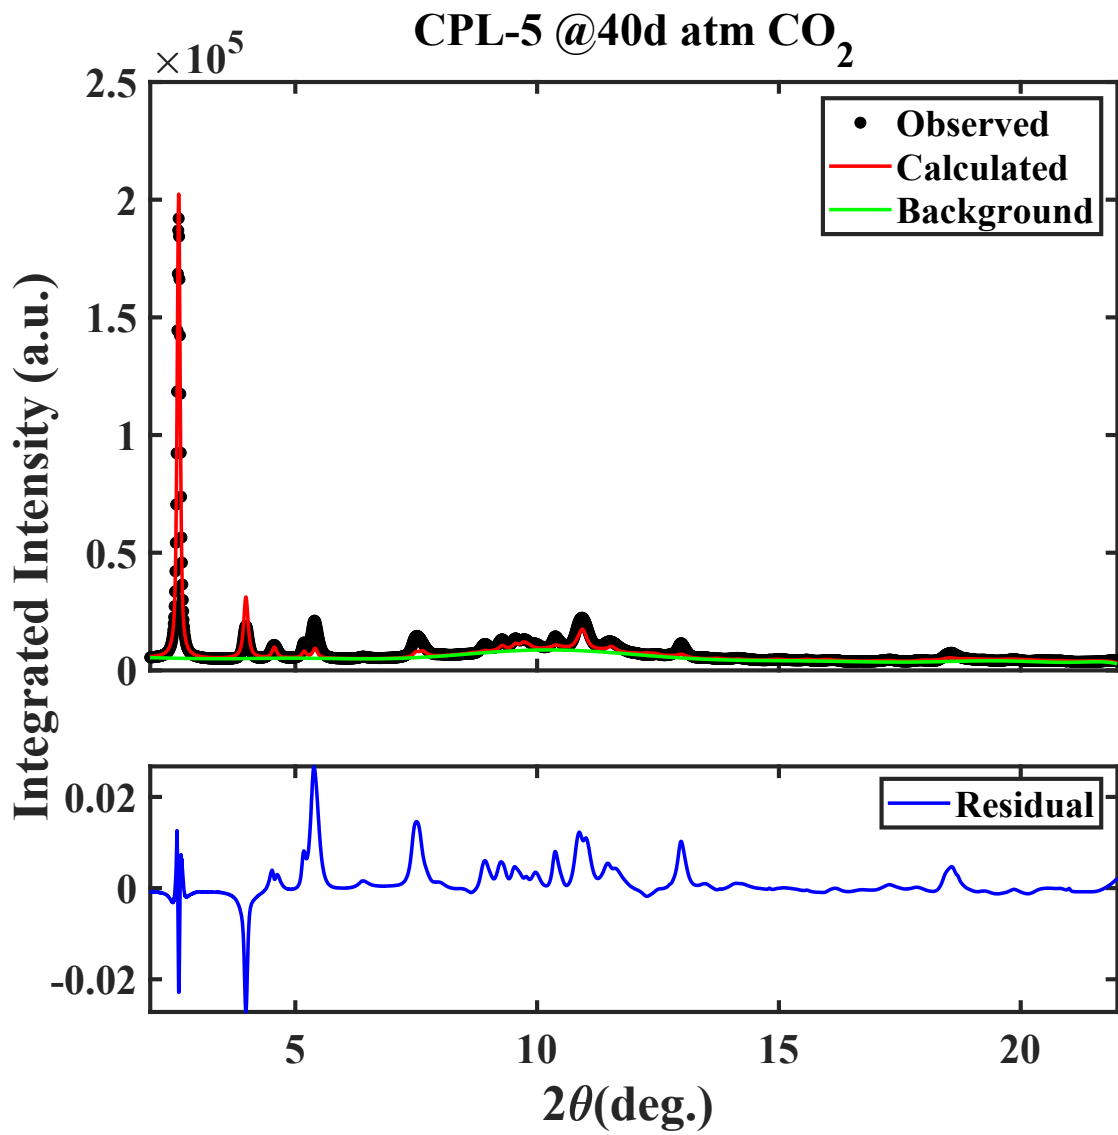



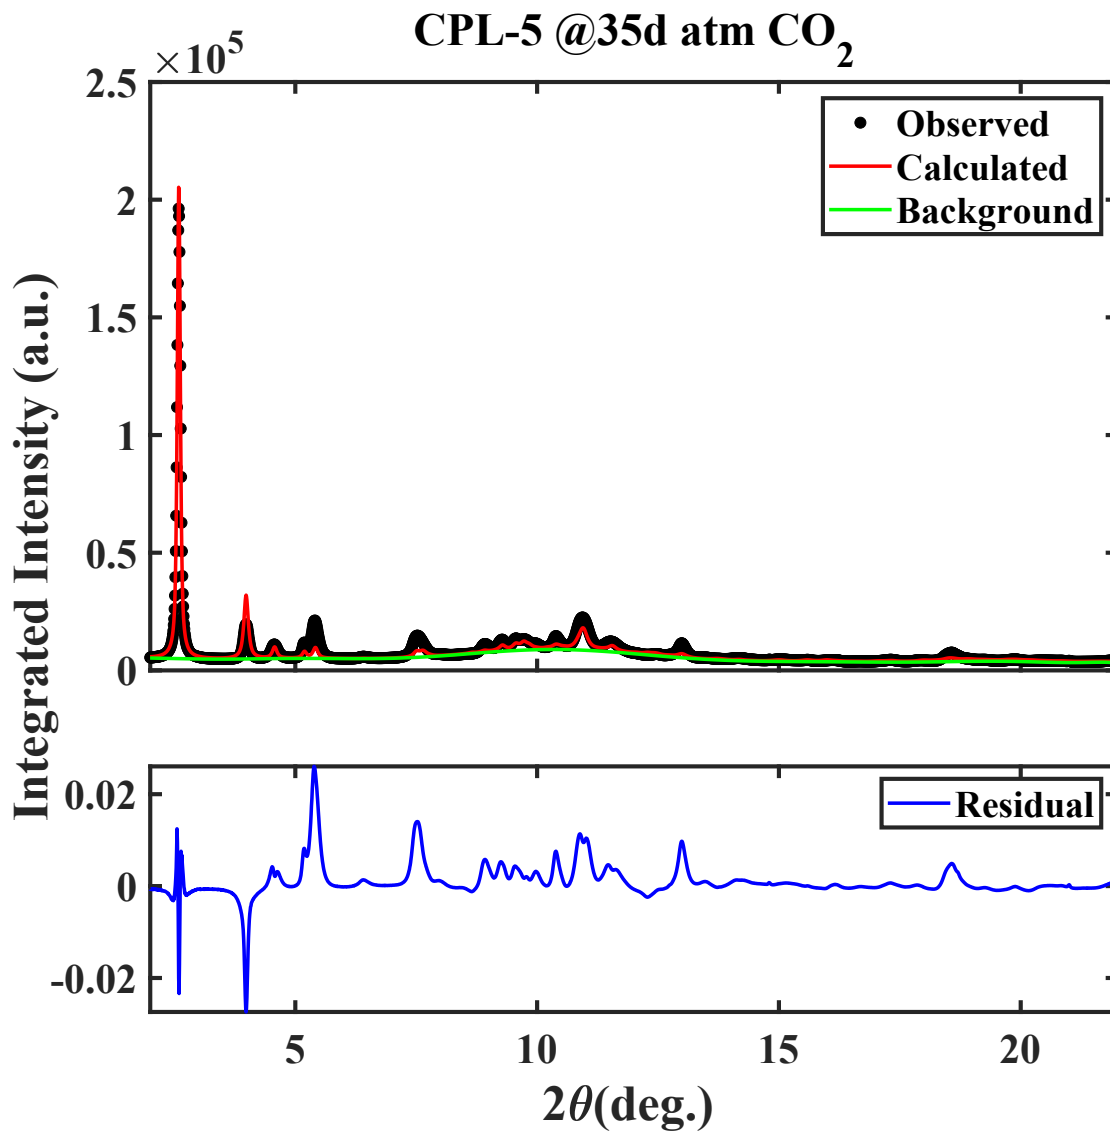

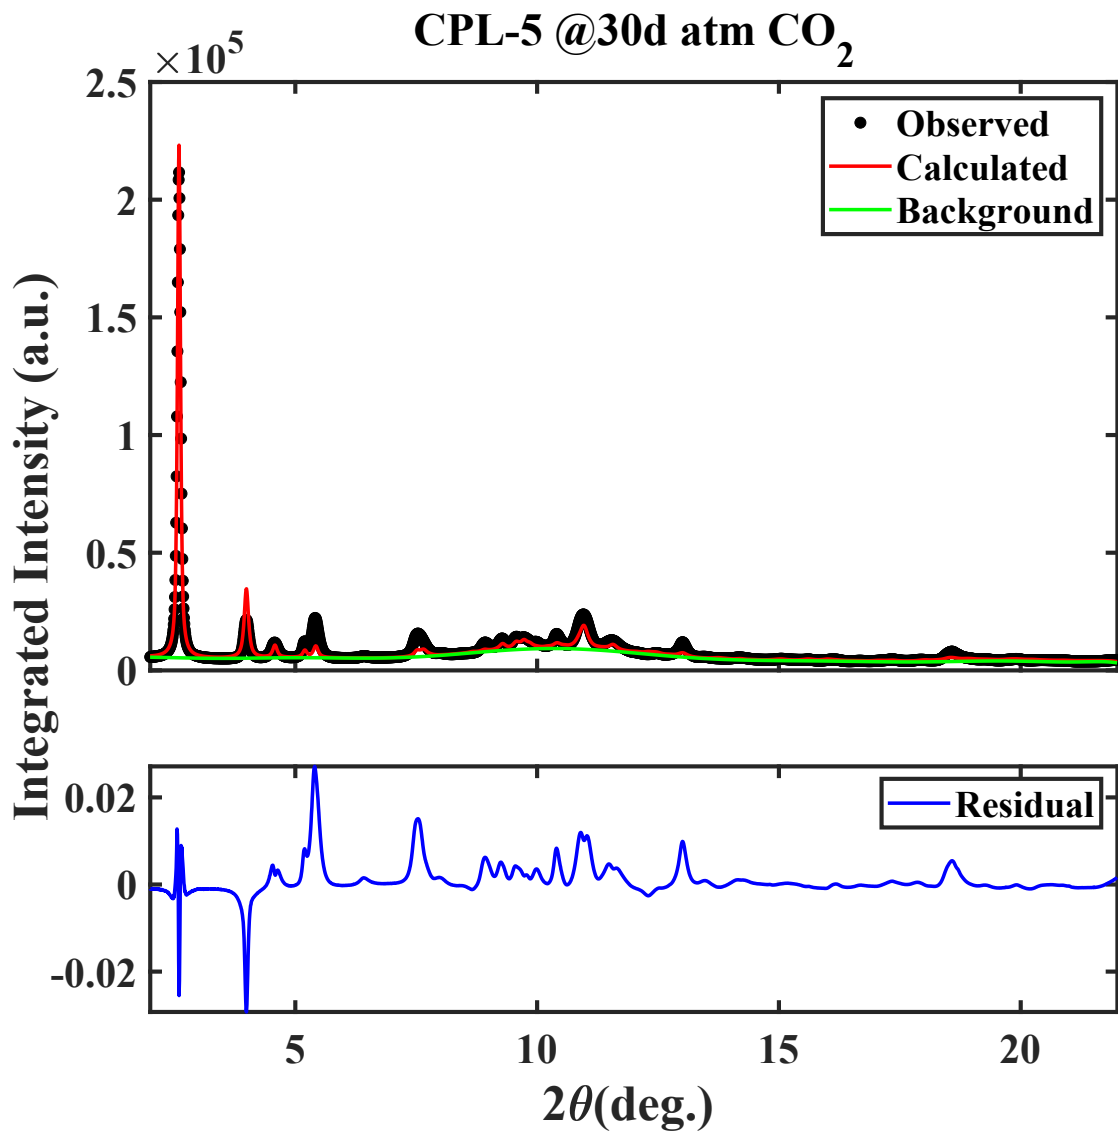

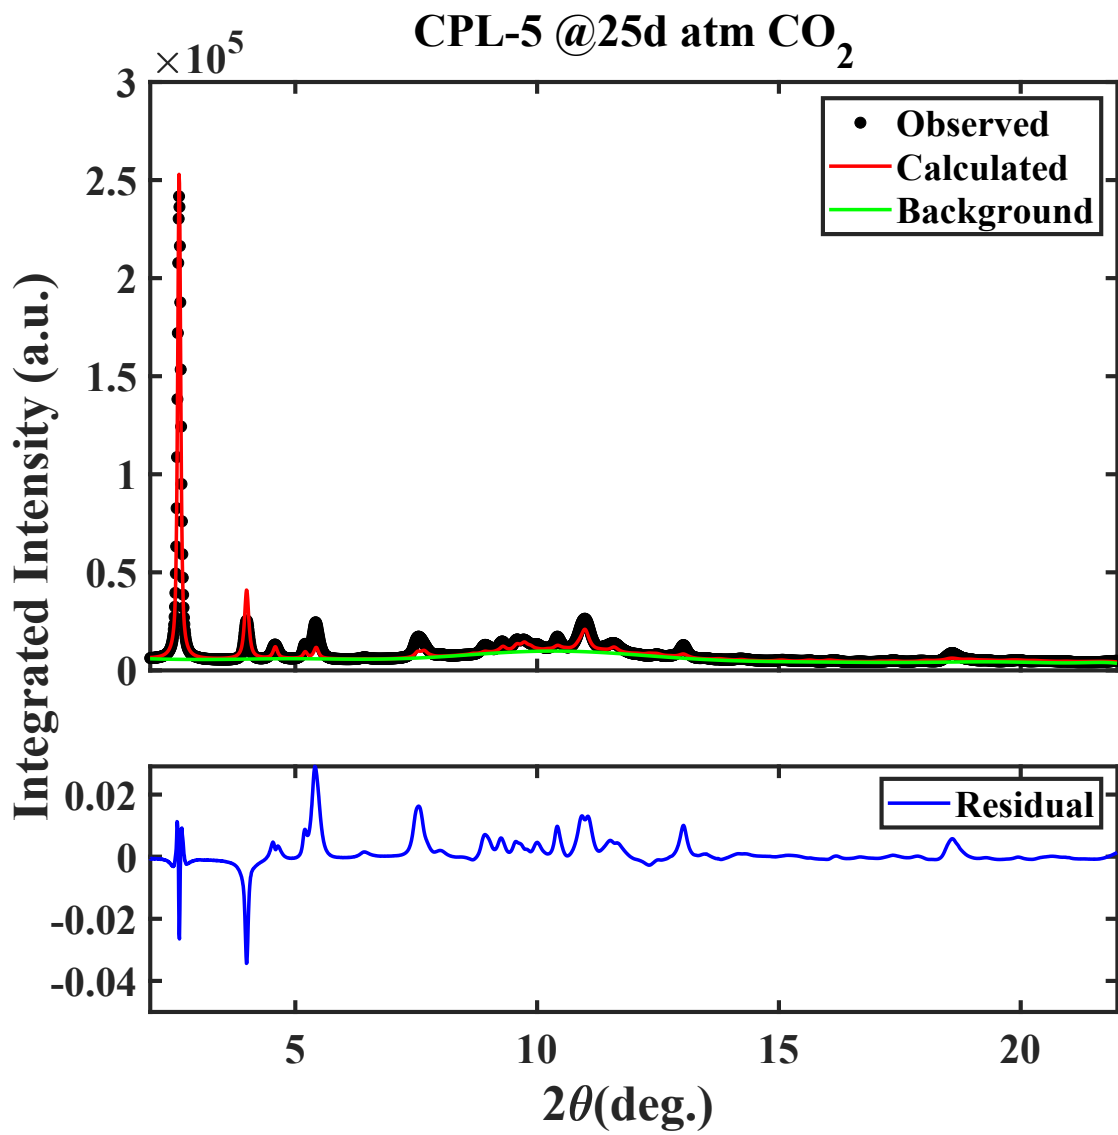

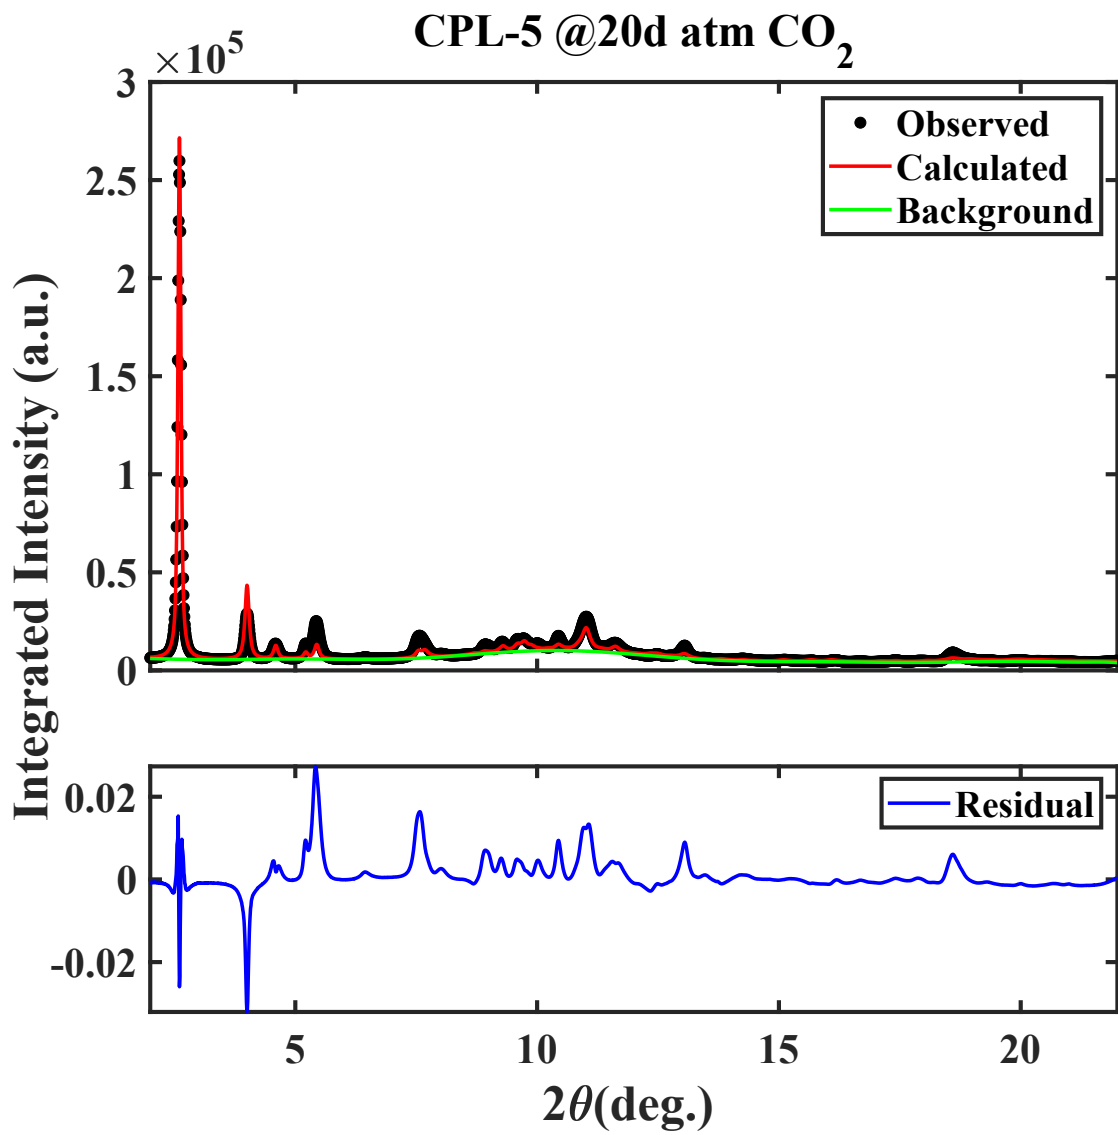

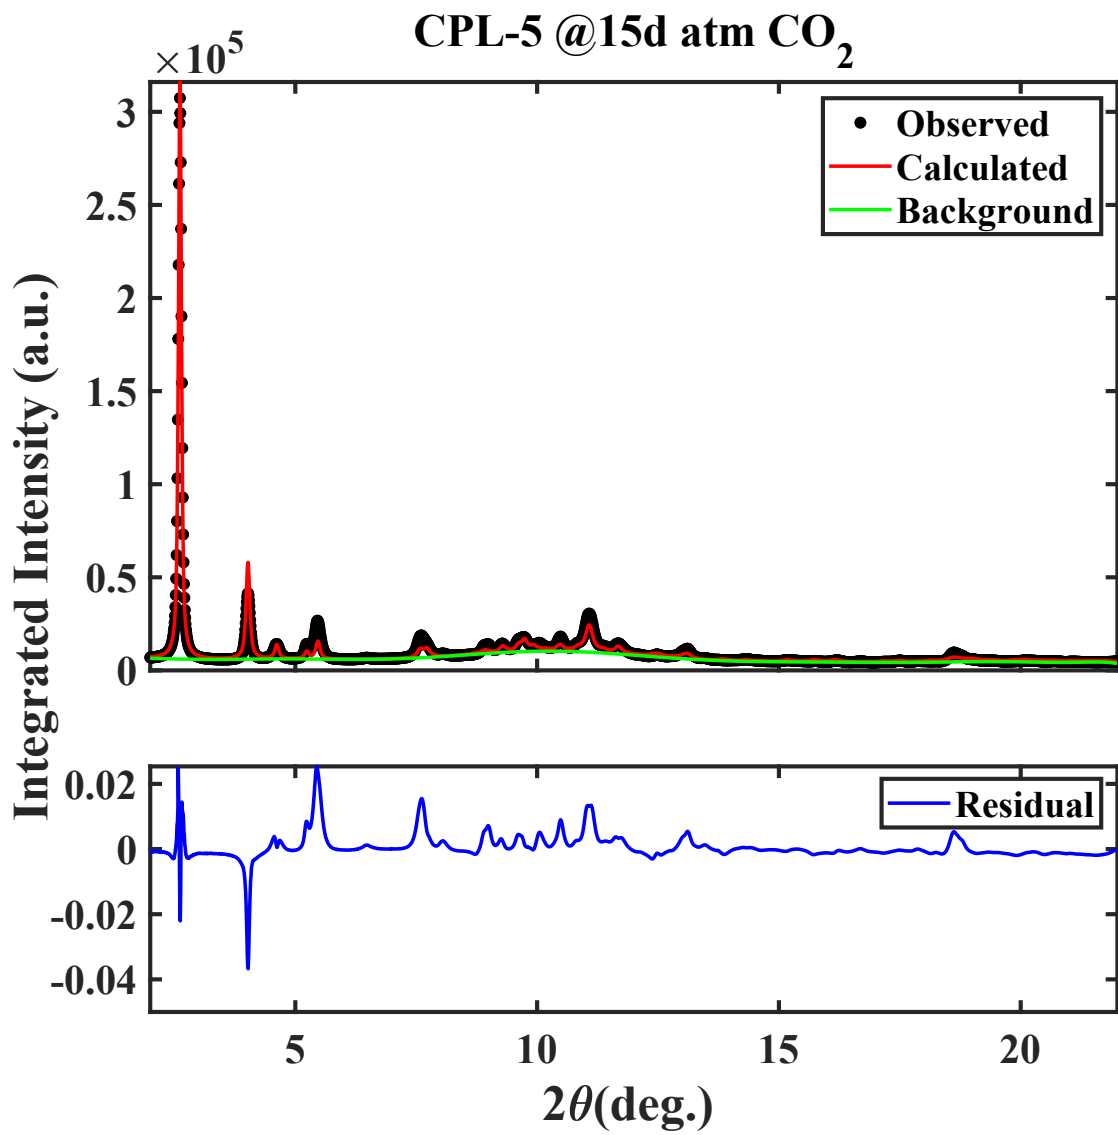

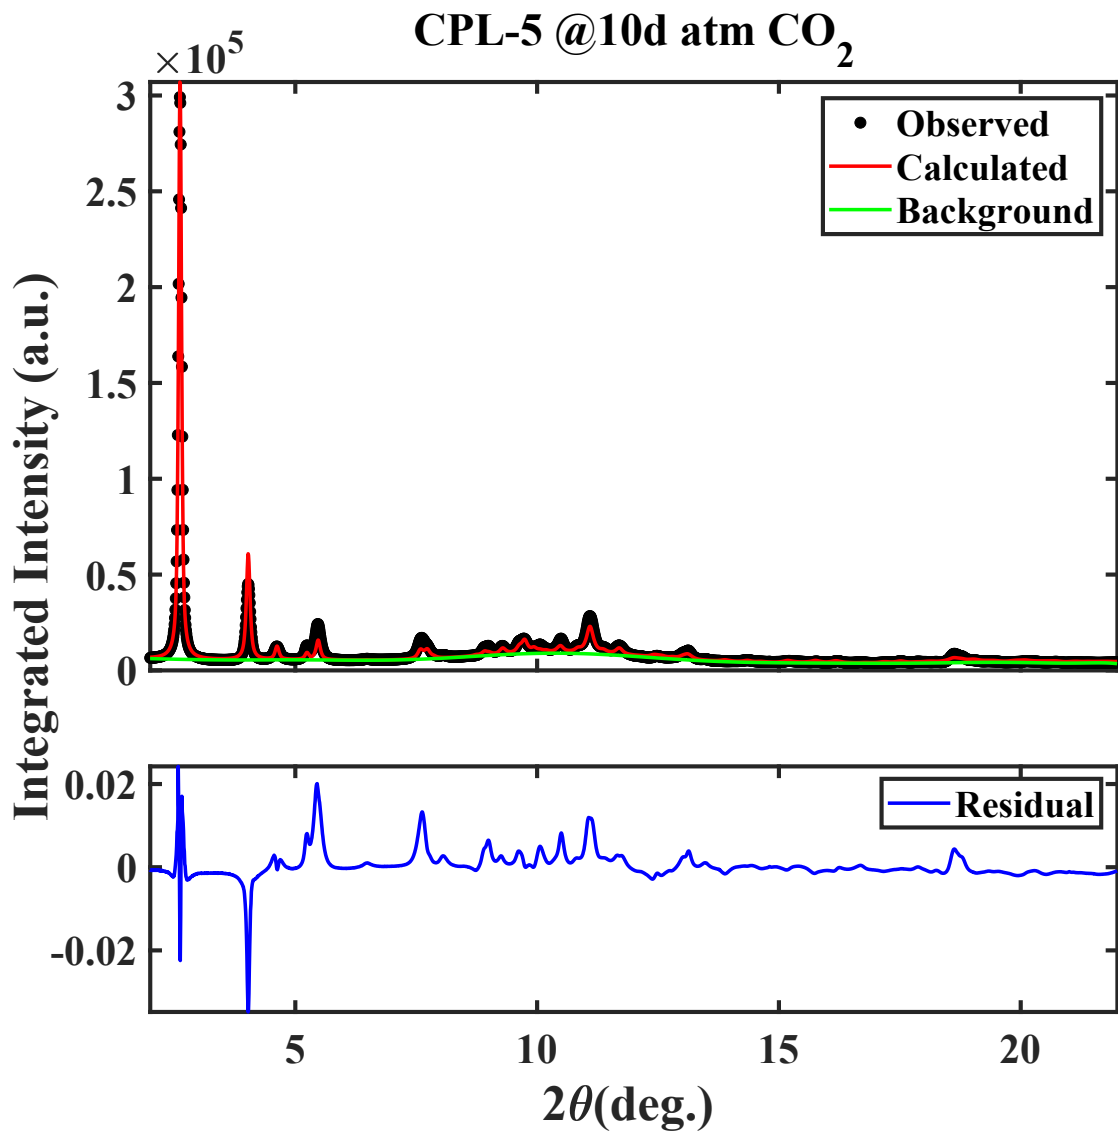

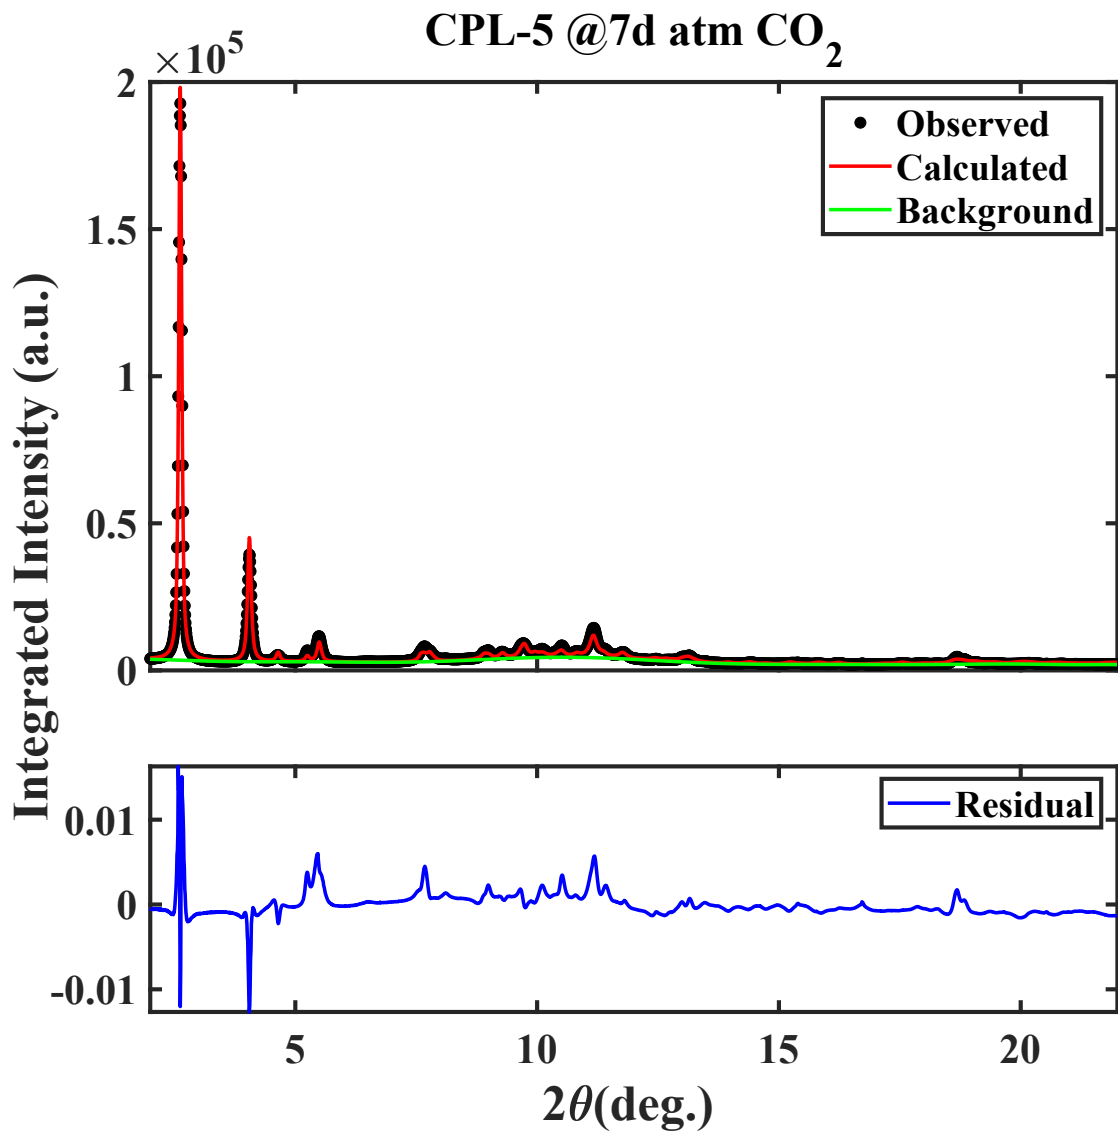

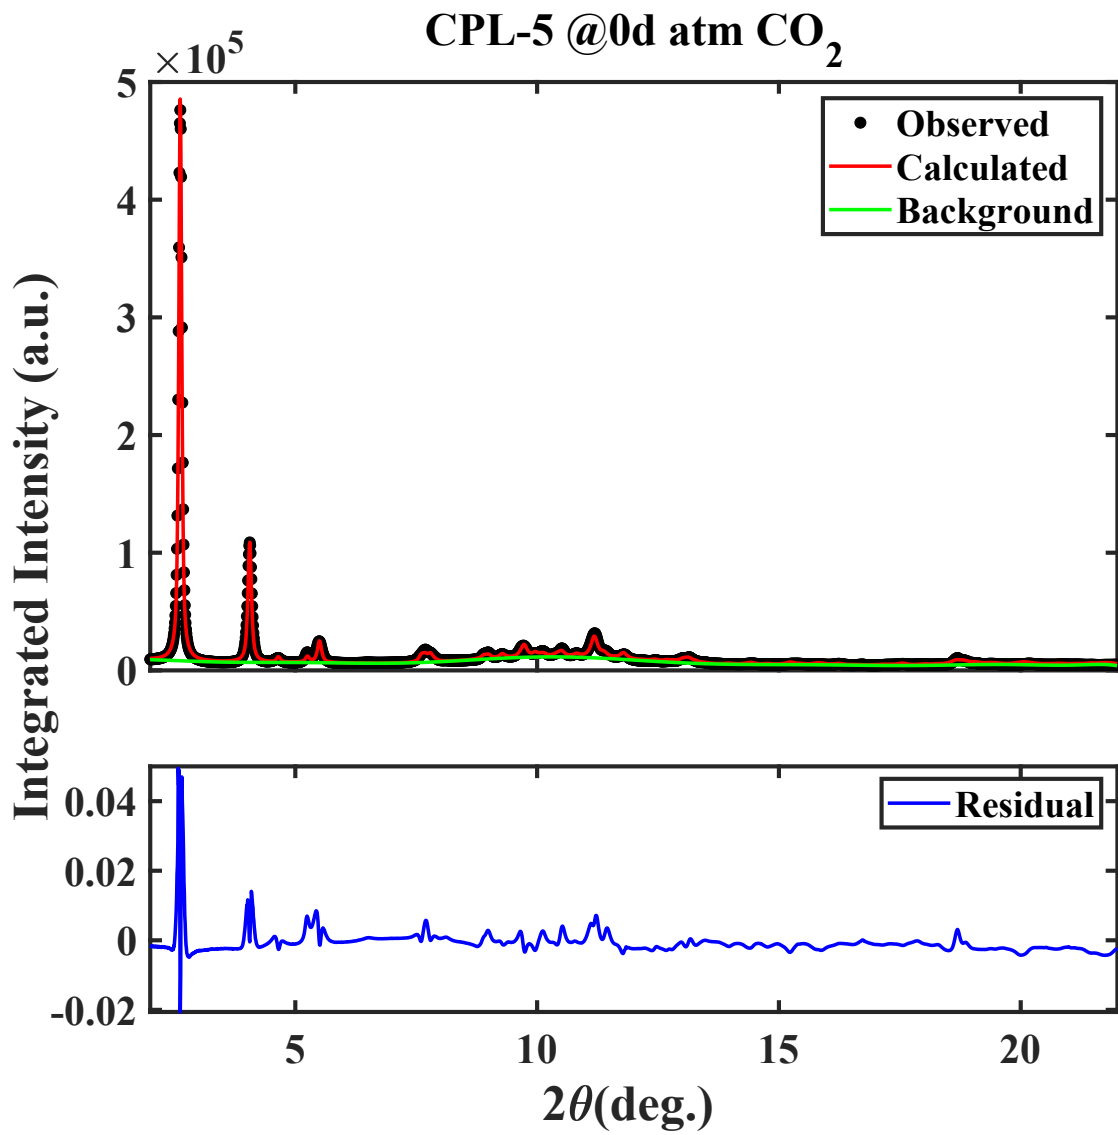

Supplement: d0ta03298k1.pdf [file d0ta03298k1.pdf]
